# Supplementary material
Source: publisher figshare collection journal article supplement (https://frontiersin.figshare.com/ndownloader/files/25754819)
Supplement: Supplementary file [file 25754819]

## ***Supplementary Material***

### **1 SUPPLEMENTARY FIGURES**

- Correlation with gestational age for all features including
  - Apparent diffusion coefficients (ADC)
    - The 5th percentile ADC (Figure S1)
    - The 10th percentile ADC (Figure S2)
    - The 15th percentile ADC (Figure S3)
    - The 20th percentile ADC (Figure S4)
    - The 25th percentile ADC (Figure S5)
    - The 30th percentile ADC (Figure S6)
    - The 35th percentile ADC (Figure S7)
    - The 40th percentile ADC (Figure S8)
    - The 45th percentile ADC (Figure S9)
    - The 50th percentile ADC (Figure S10)
    - The 55th percentile ADC (Figure S11)
    - The 60th percentile ADC (Figure S12)
    - The 65th percentile ADC (Figure S13)
    - The 70th percentile ADC (Figure S14)
    - The 75th percentile ADC (Figure S15)
    - The 80th percentile ADC (Figure S16)
    - The 85th percentile ADC (Figure S17)
    - The 90th percentile ADC (Figure S18)
    - The 95th percentile ADC (Figure S19)
    - Mean ADC (Figure S20)
    - Minimum ADC (Figure S21)
    - Maximum ADC (Figure S22)
  - Texture features
    - Angular second moment (ASM) (Figure S23)
    - Contrast (Figure S24)
    - Dissimilarity (Figure S25)
    - Energy (Figure S26)
    - Entropy (Figure S27)
    - Homogeneity (Figure S28)
    - Kurtosis (Figure S29)
    - Skewness (Figure S30)
    - Variance (Figure S31)

- Diagnostic ability through receiver operating characteristics for all features including
  - ADC
    - The 5th percentile ADC (Figure S32)
    - The 10th percentile ADC (Figure S33)
    - The 15th percentile ADC (Figure S34)
    - The 20th percentile ADC (Figure S35)
    - The 25th percentile ADC (Figure S36)
    - The 30th percentile ADC (Figure S37)
    - The 35th percentile ADC (Figure S38)
    - The 40th percentile ADC (Figure S39)
    - The 45th percentile ADC (Figure S40)
    - The 50th percentile ADC (Figure S41)
    - The 55th percentile ADC (Figure S42)
    - The 60th percentile ADC (Figure S43)
    - The 65th percentile ADC (Figure S44)
    - The 70th percentile ADC (Figure S45)
    - The 75th percentile ADC (Figure S46)
    - The 80th percentile ADC (Figure S47)
    - The 85th percentile ADC (Figure S48)
    - The 90th percentile ADC (Figure S49)
    - The 95th percentile ADC (Figure S50)
    - Mean ADC (Figure S51)
    - Minimum ADC (Figure S52)
    - Maximum ADC (Figure S53)
  - Texture features
    - Angular second moment (ASM) (Figure S54)
    - Contrast (Figure S55)
    - Dissimilarity (Figure S56)
    - Energy (Figure S57)
    - Entropy (Figure S58)
    - Homogeneity (Figure S59)
    - Kurtosis (Figure S60)
    - Skewness (Figure S61)
    - Variance (Figure S62)

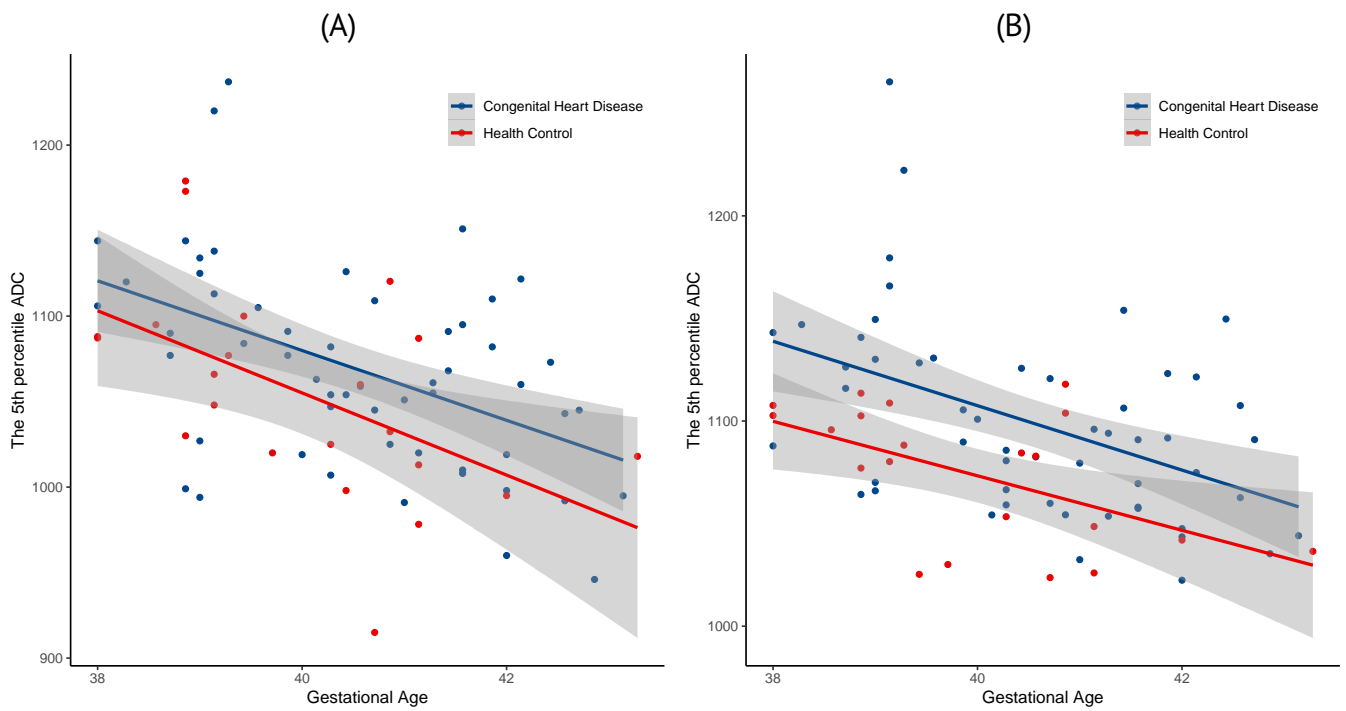

**Figure S1.** Regression analysis for the 5<sup>th</sup> percentile apparent diffusion coefficients with gestational age, comparing single- (A) and multi-slice (B) diffusion weighted imaging.

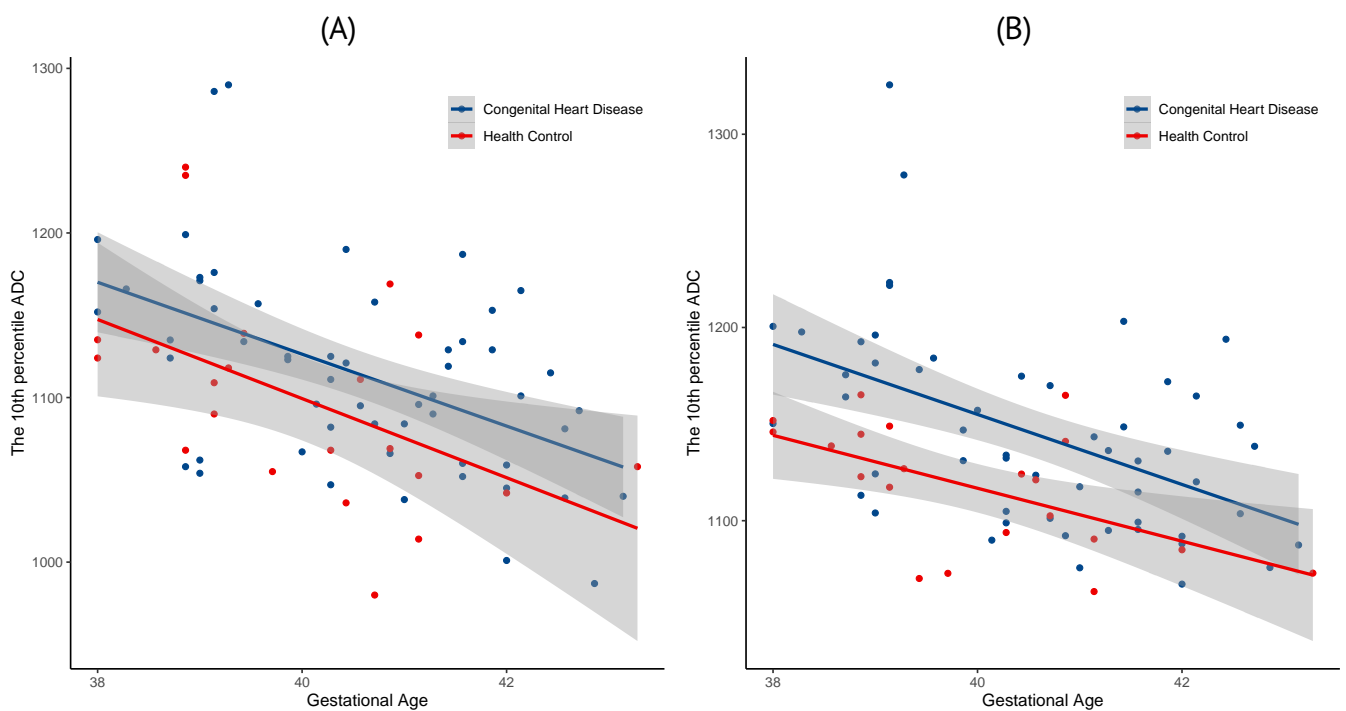

**Figure S2.** Regression analysis for the 10<sup>th</sup> percentile apparent diffusion coefficients with gestational age, comparing single- (A) and multi-slice (B) diffusion weighted imaging.

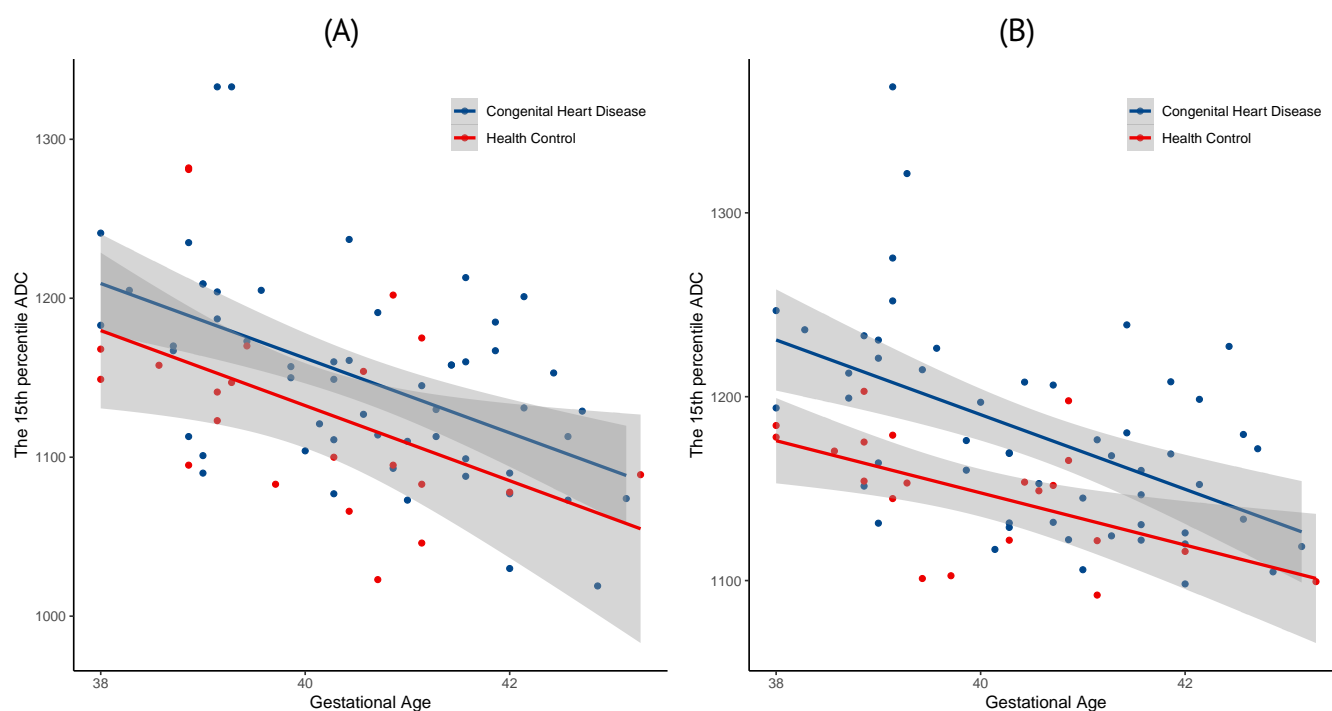

**Figure S3.** Regression analysis for the 15<sup>th</sup> percentile apparent diffusion coefficients with gestational age, comparing single- (A) and multi-slice (B) diffusion weighted imaging.

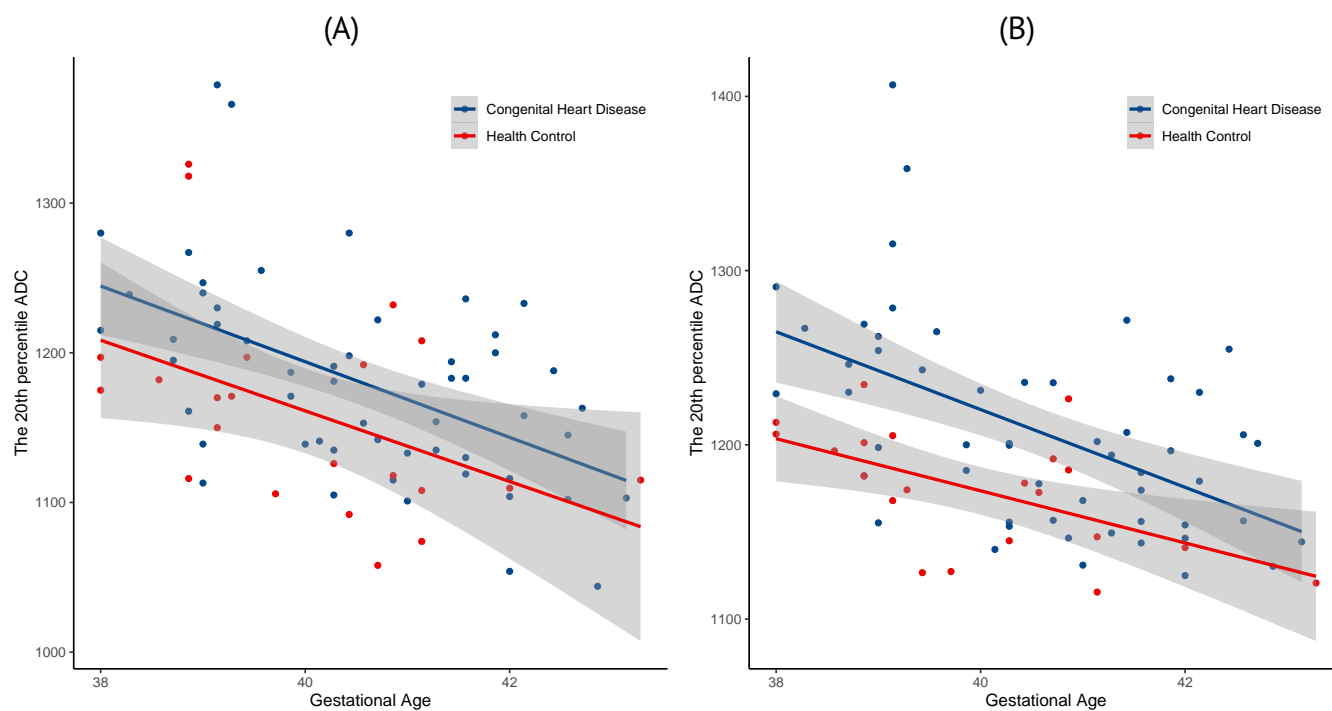

**Figure S4.** Regression analysis for the 20<sup>th</sup> percentile apparent diffusion coefficients with gestational age, comparing single- (A) and multi-slice (B) diffusion weighted imaging.

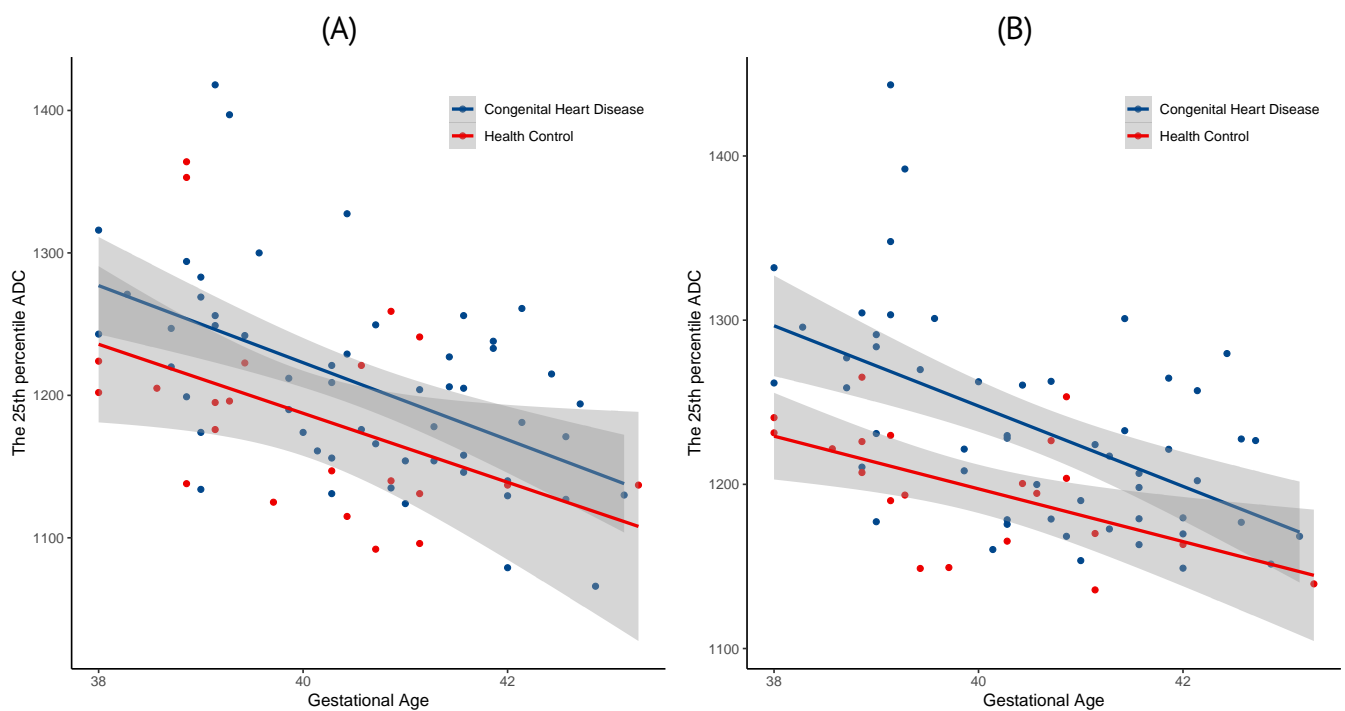

**Figure S5.** Regression analysis for the 25<sup>th</sup> percentile apparent diffusion coefficients with gestational age, comparing single- (A) and multi-slice (B) diffusion weighted imaging.

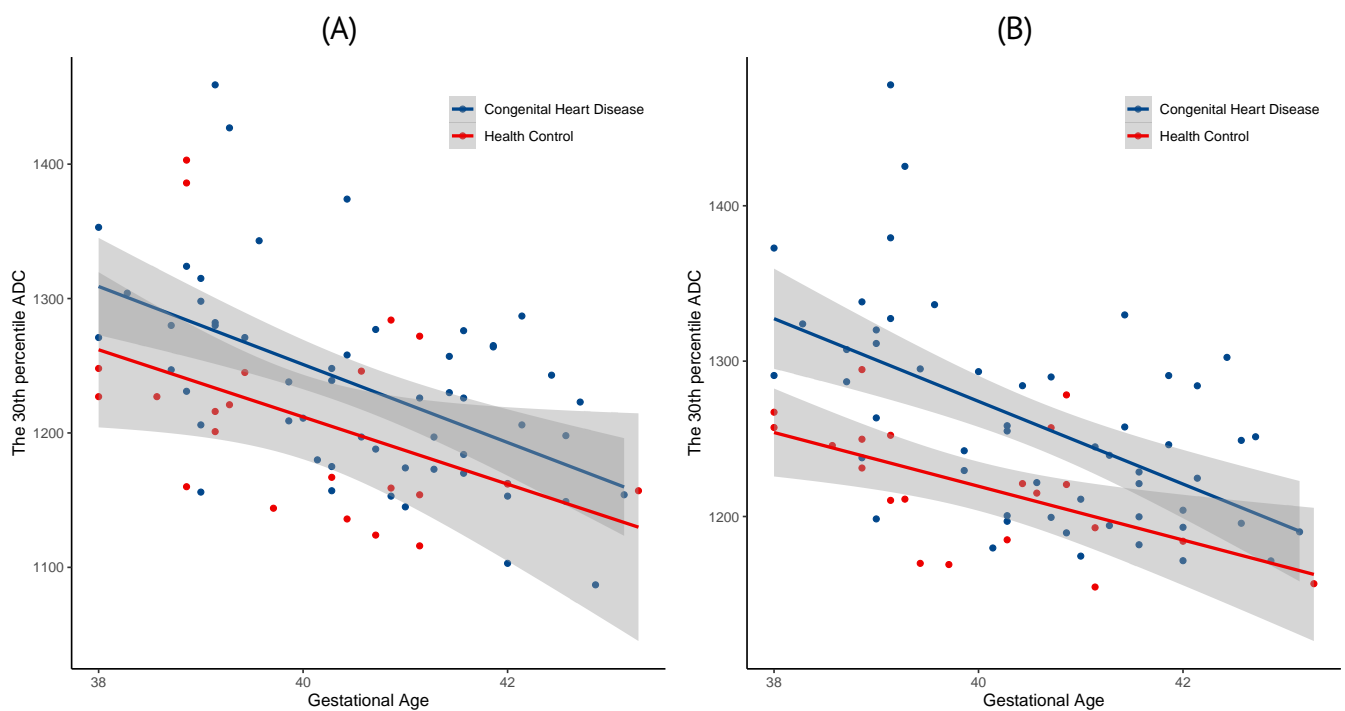

**Figure S6.** Regression analysis for the 30<sup>th</sup> percentile apparent diffusion coefficients with gestational age, comparing single- (A) and multi-slice (B) diffusion weighted imaging.

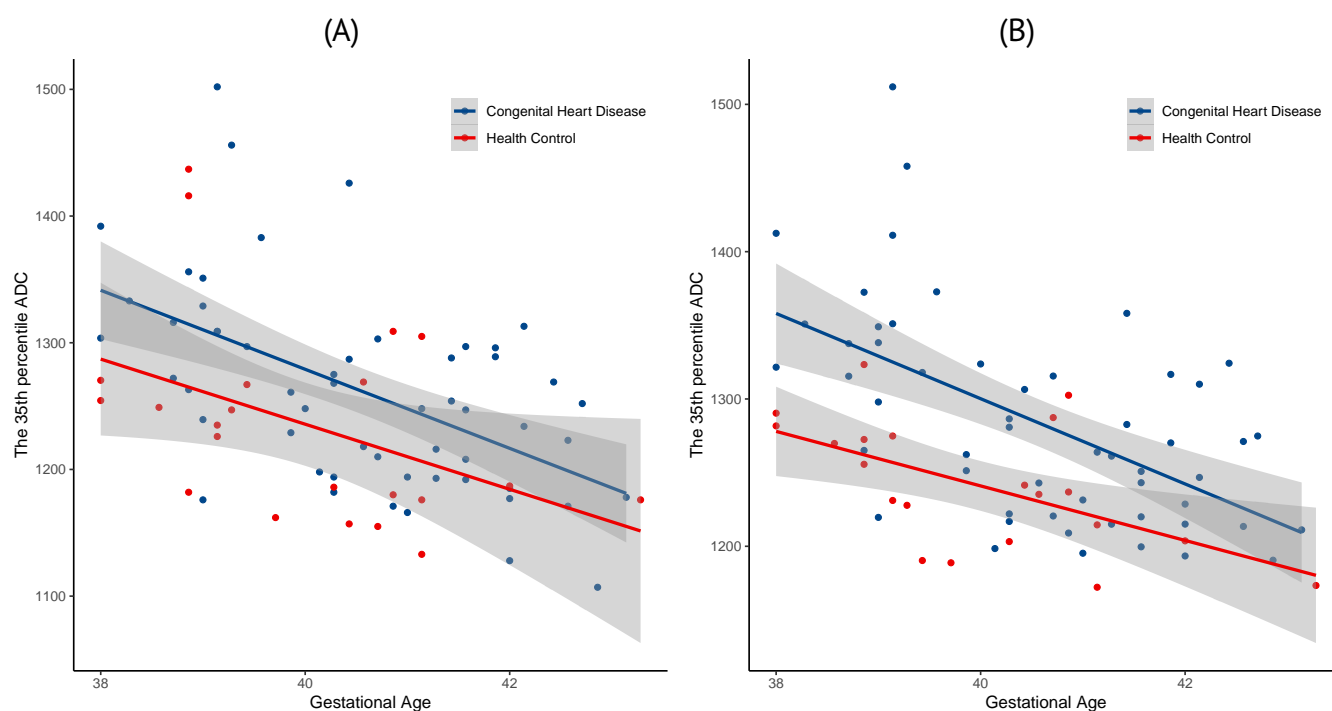

**Figure S7.** Regression analysis for the 35<sup>th</sup> percentile apparent diffusion coefficients with gestational age, comparing single- (A) and multi-slice (B) diffusion weighted imaging.

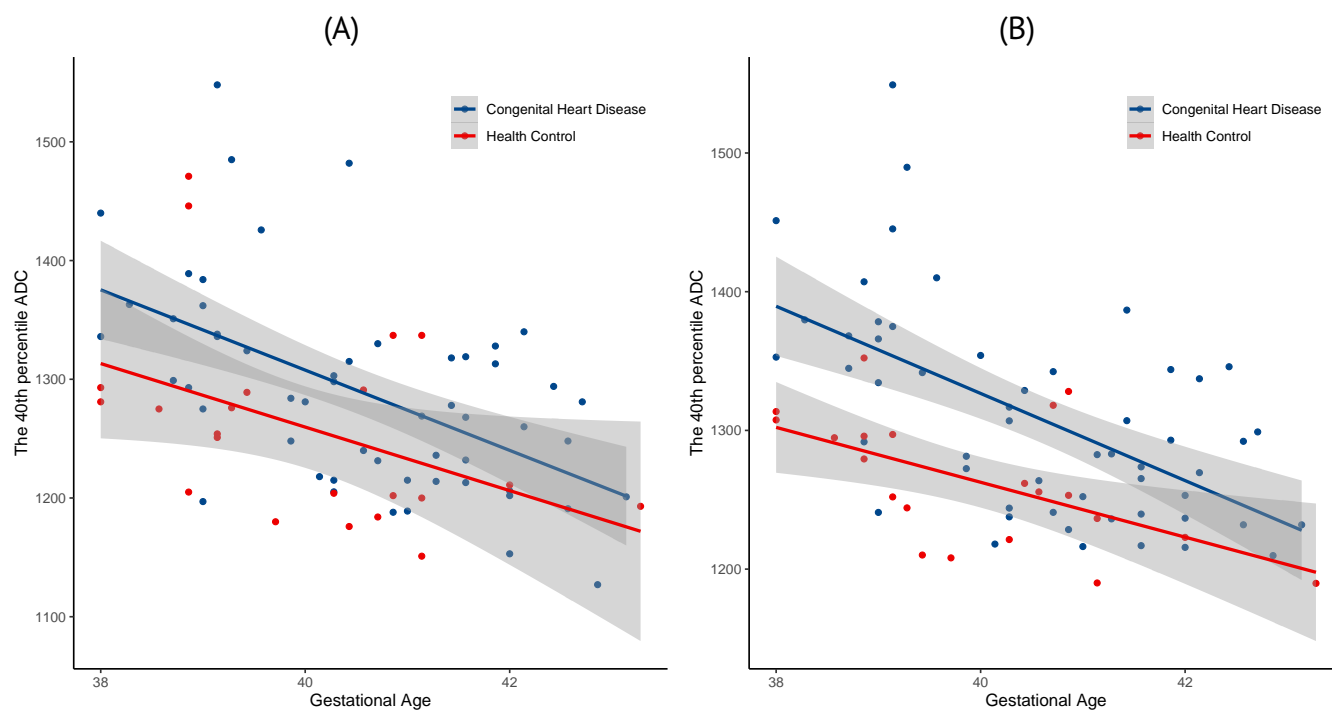

**Figure S8.** Regression analysis for the 40<sup>th</sup> percentile apparent diffusion coefficients with gestational age, comparing single- (A) and multi-slice (B) diffusion weighted imaging.

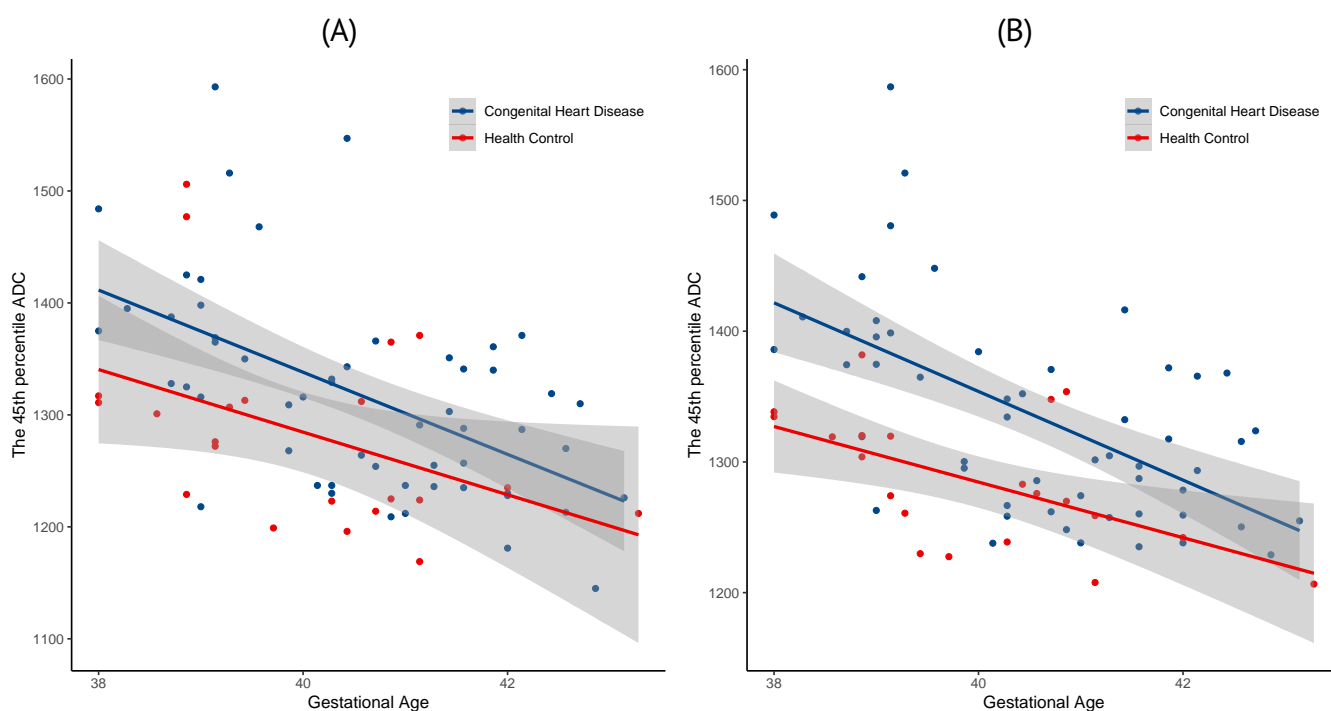

**Figure S9.** Regression analysis for the 45<sup>th</sup> percentile apparent diffusion coefficients with gestational age, comparing single- (A) and multi-slice (B) diffusion weighted imaging.

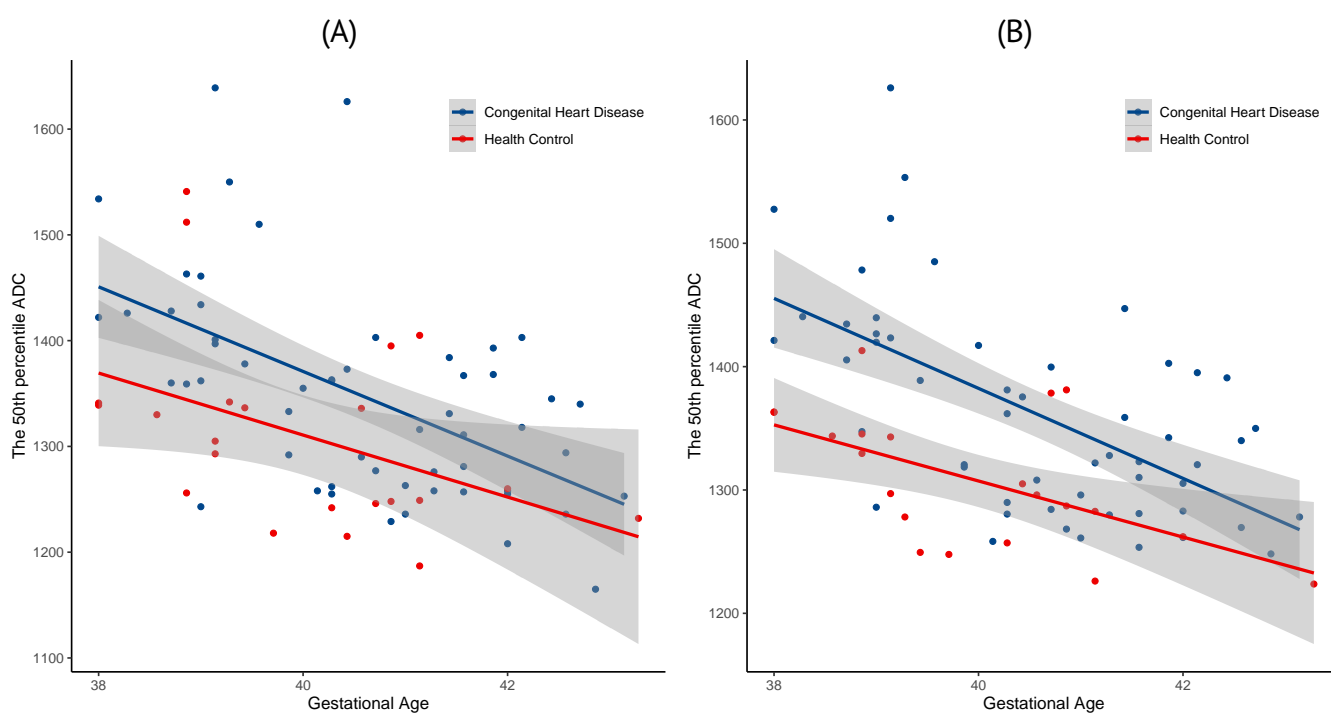

**Figure S10.** Regression analysis for the 50<sup>th</sup> percentile apparent diffusion coefficients with gestational age, comparing single- (A) and multi-slice (B) diffusion weighted imaging.

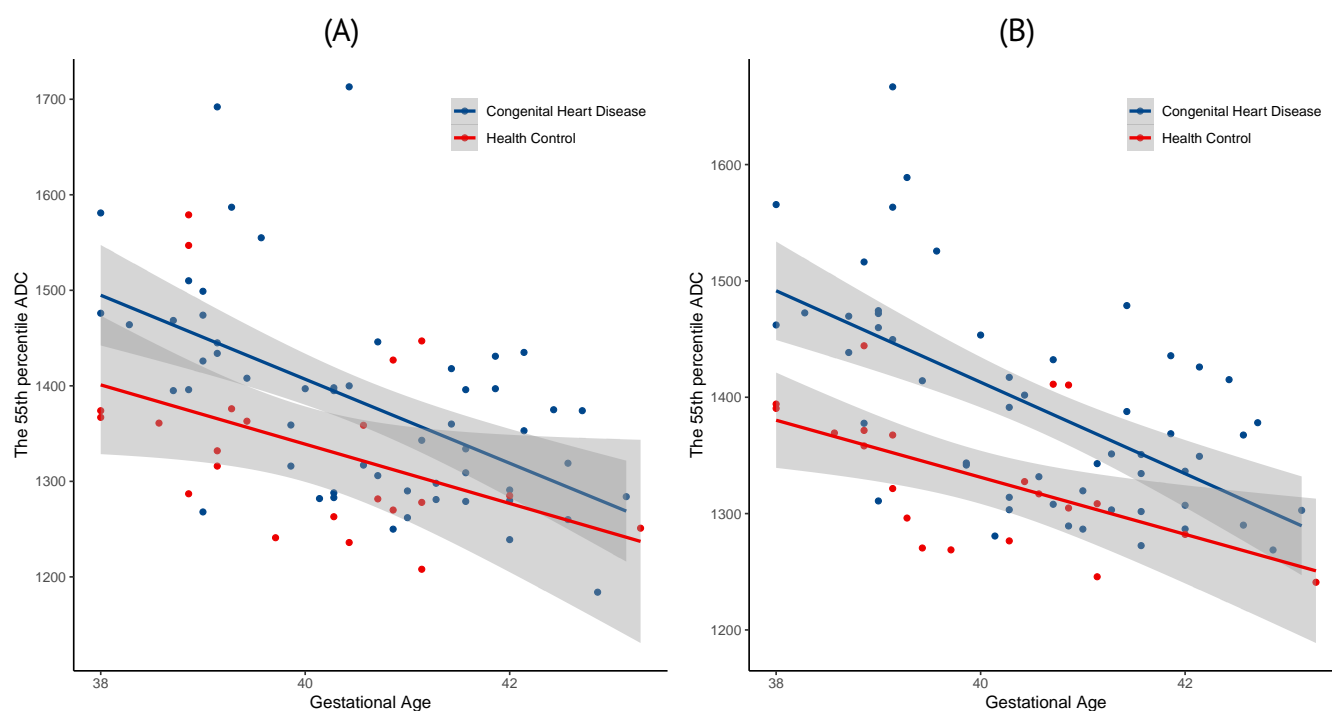

**Figure S11.** Regression analysis for the 55<sup>th</sup> percentile apparent diffusion coefficients with gestational age, comparing single- (A) and multi-slice (B) diffusion weighted imaging.

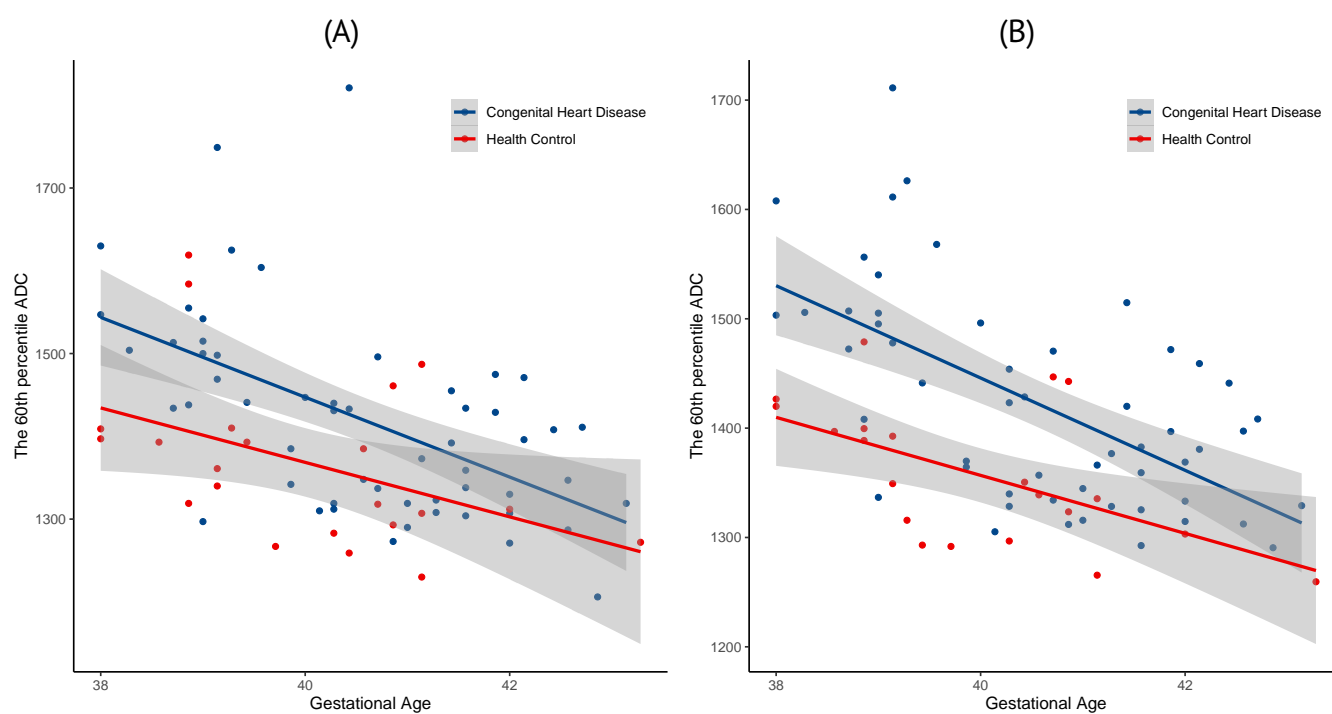

**Figure S12.** Regression analysis for the 60<sup>th</sup> percentile apparent diffusion coefficients with gestational age, comparing single- (A) and multi-slice (B) diffusion weighted imaging.



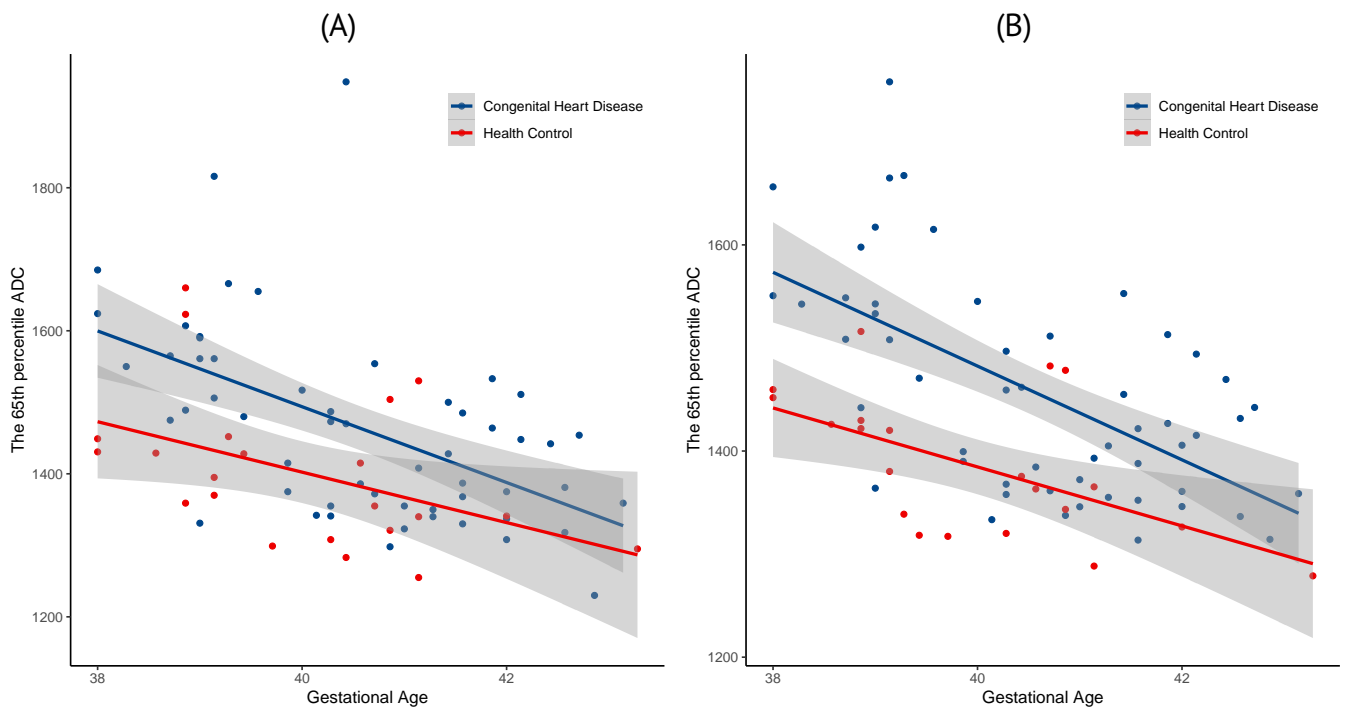

**Figure S13.** Regression analysis for the 65<sup>th</sup> percentile apparent diffusion coefficients with gestational age, comparing single- (A) and multi-slice (B) diffusion weighted imaging.

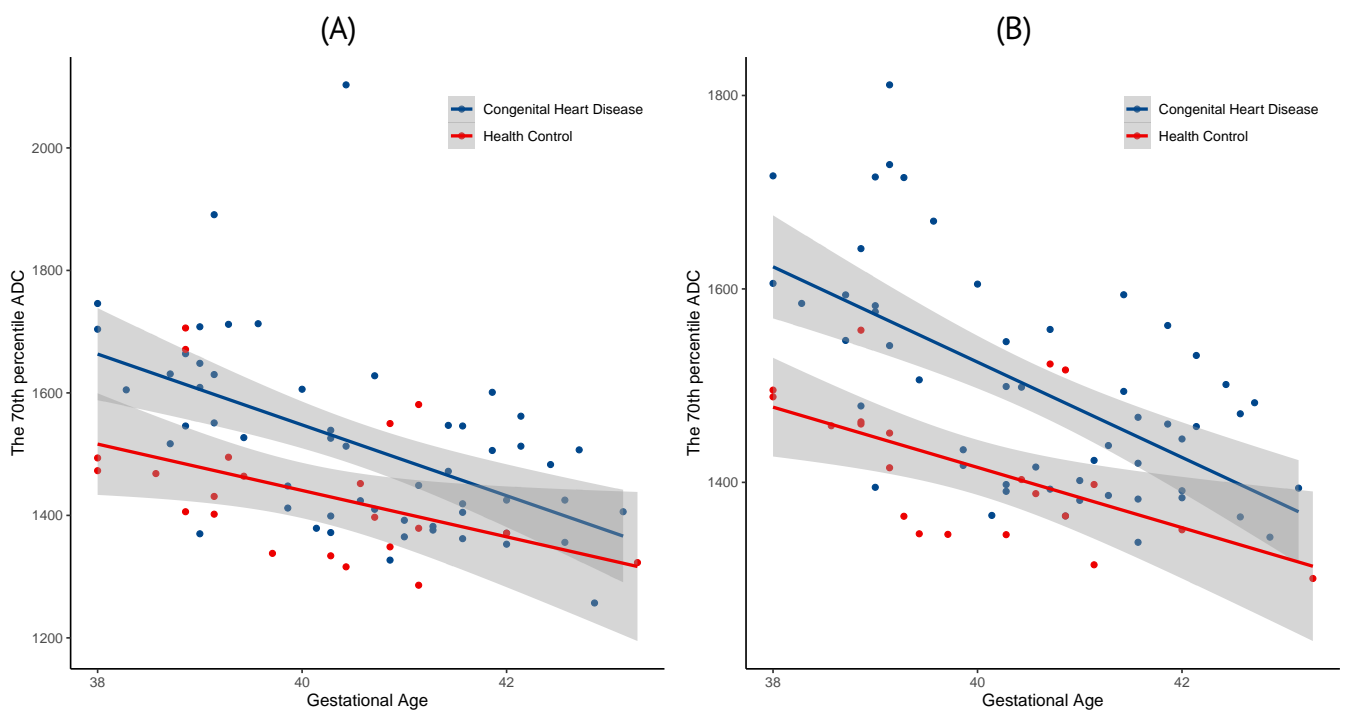

**Figure S14.** Regression analysis for the 70<sup>th</sup> percentile apparent diffusion coefficients with gestational age, comparing single- (A) and multi-slice (B) diffusion weighted imaging.

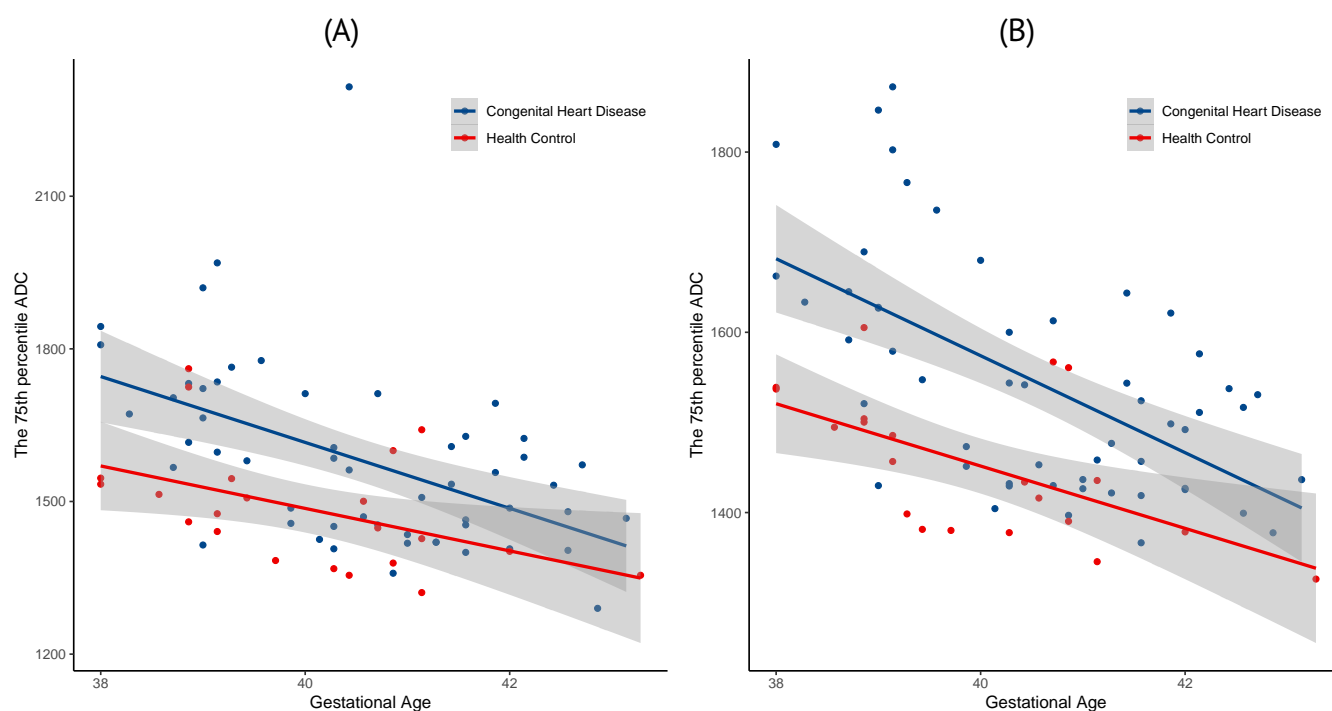

**Figure S15.** Regression analysis for the 75<sup>th</sup> percentile apparent diffusion coefficients with gestational age, comparing single- (A) and multi-slice (B) diffusion weighted imaging.

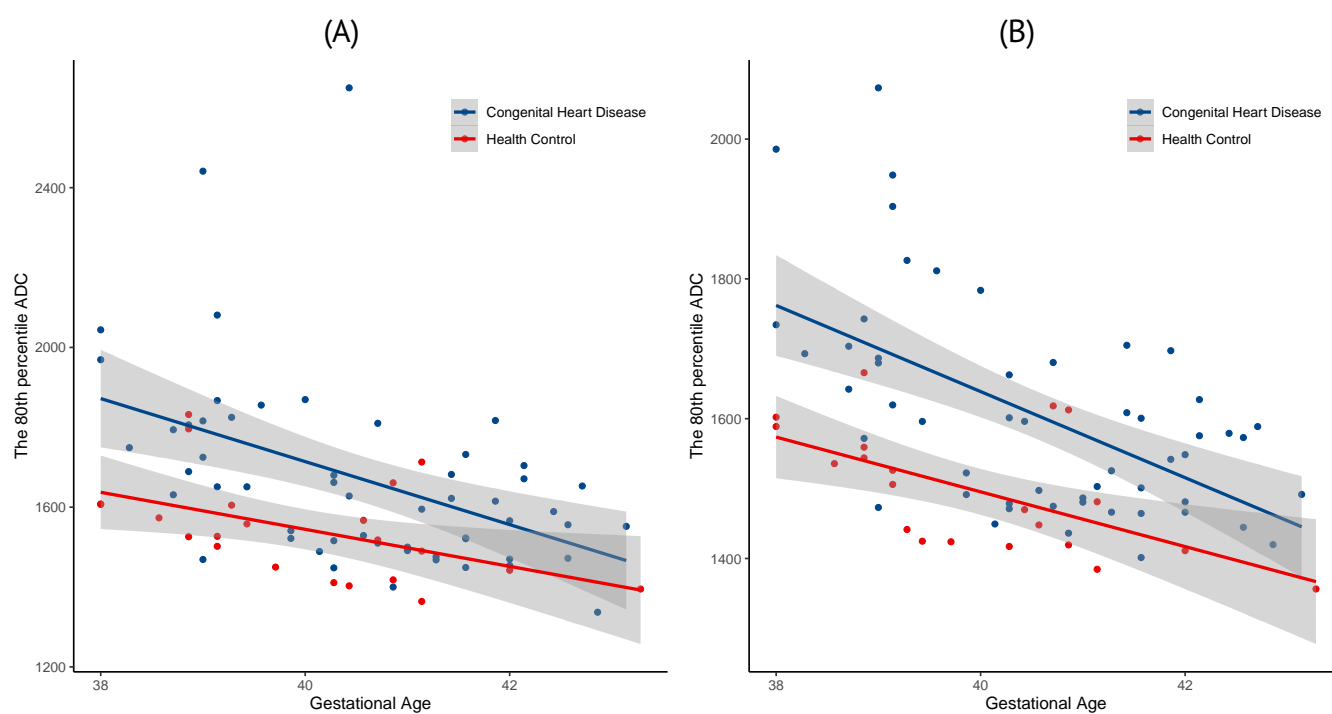

**Figure S16.** Regression analysis for the 80<sup>th</sup> percentile apparent diffusion coefficients with gestational age, comparing single- (A) and multi-slice (B) diffusion weighted imaging.

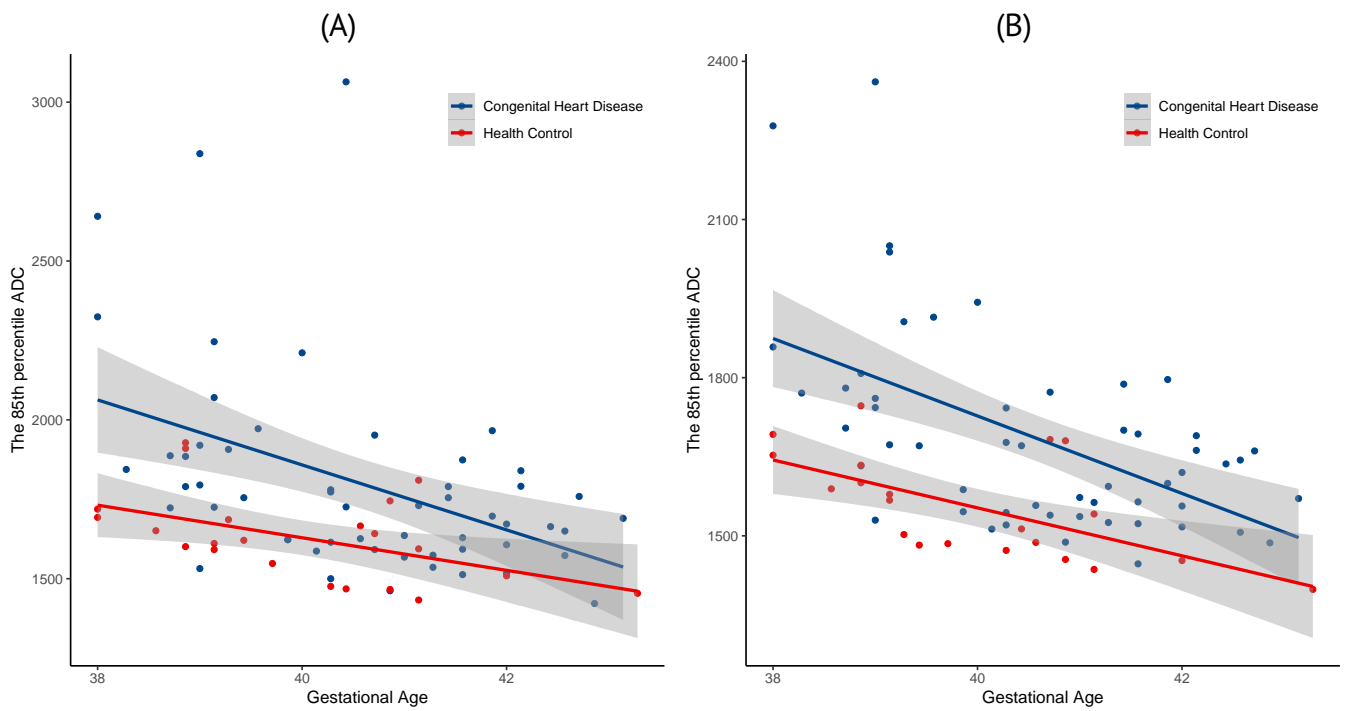

**Figure S17.** Regression analysis for the 85<sup>th</sup> percentile apparent diffusion coefficients with gestational age, comparing single- (A) and multi-slice (B) diffusion weighted imaging.

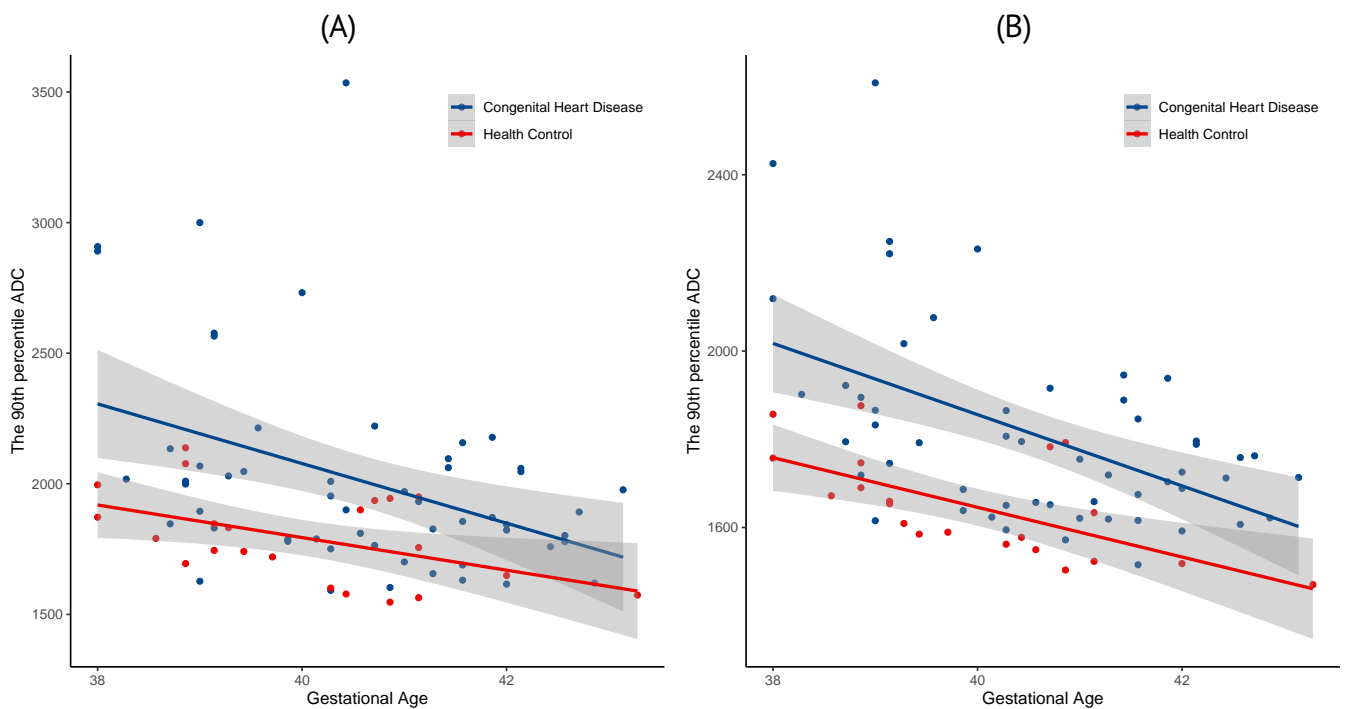

**Figure S18.** Regression analysis for the 90<sup>th</sup> percentile apparent diffusion coefficients with gestational age, comparing single- (A) and multi-slice (B) diffusion weighted imaging.

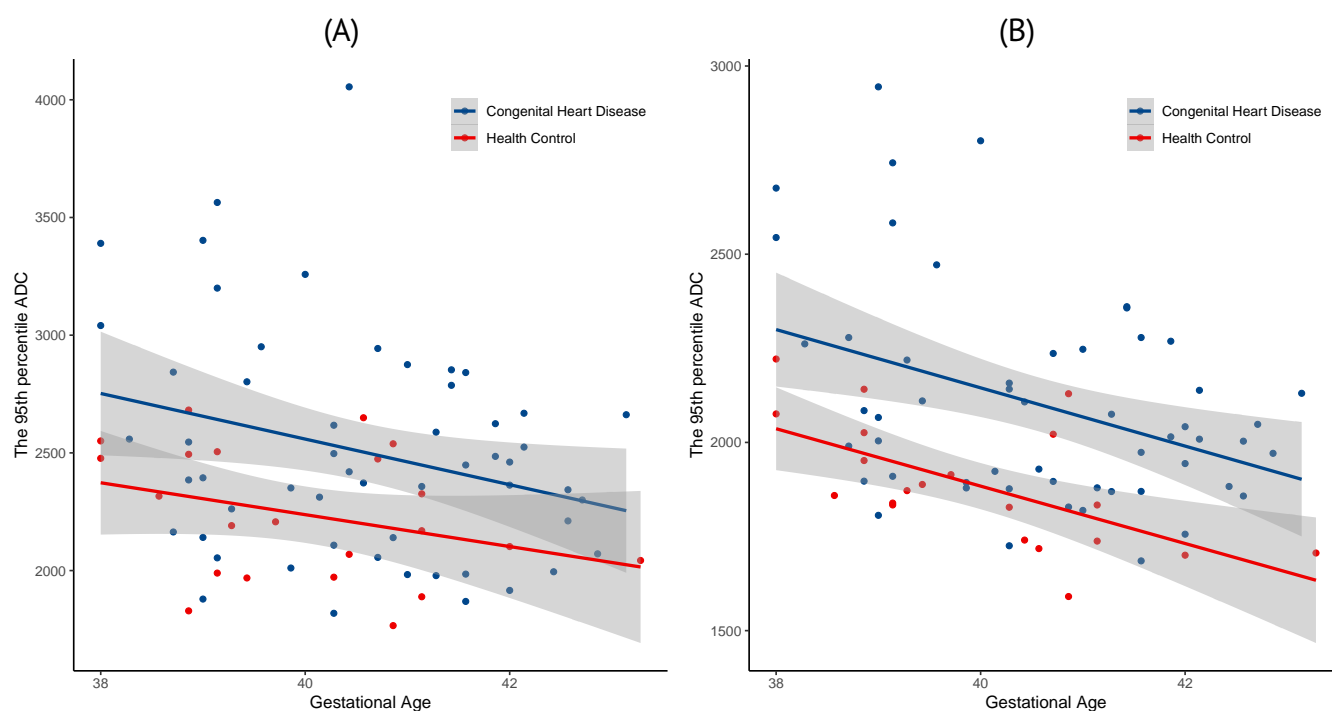

**Figure S19.** Regression analysis for the 95<sup>th</sup> percentile apparent diffusion coefficients with gestational age, comparing single- (A) and multi-slice (B) diffusion weighted imaging.

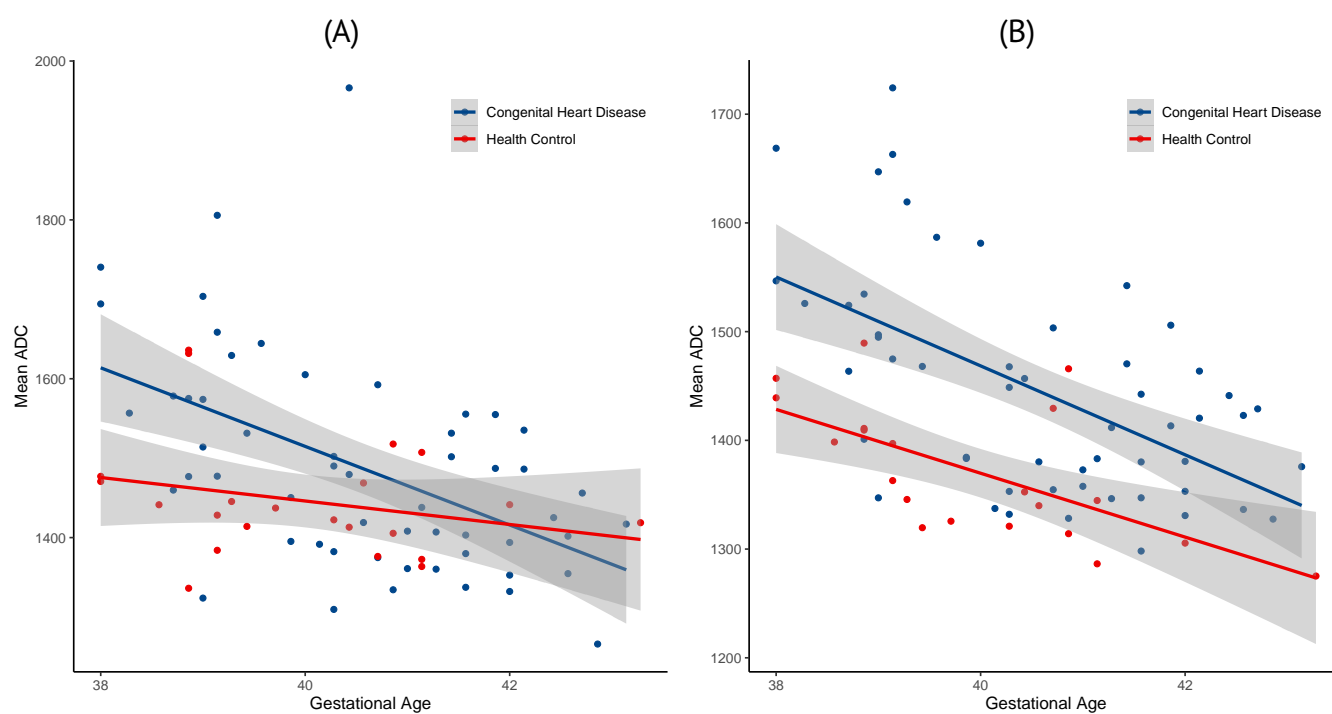

**Figure S20.** Regression analysis for the mean of apparent diffusion coefficients with gestational age, comparing single- (A) and multi-slice (B) diffusion weighted imaging.

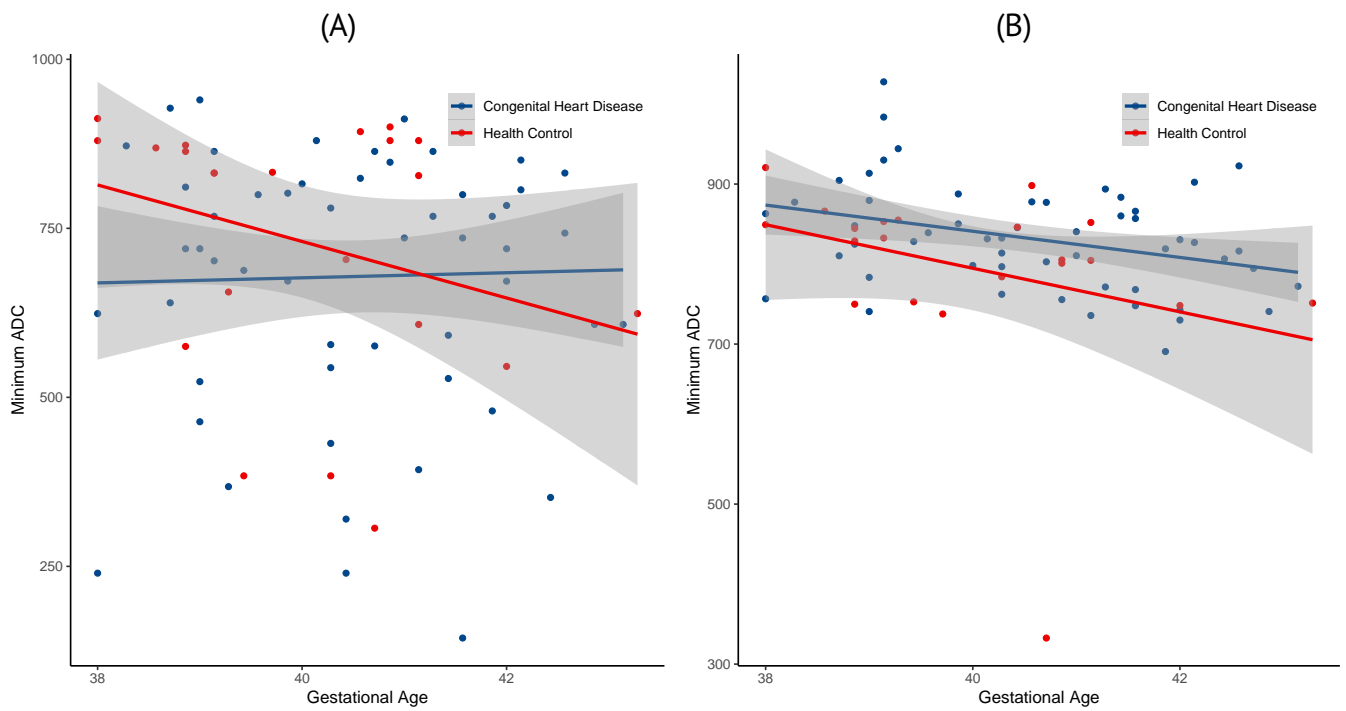

**Figure S21.** Regression analysis for the minimum of apparent diffusion coefficients with gestational age, comparing single- (A) and multi-slice (B) diffusion weighted imaging.

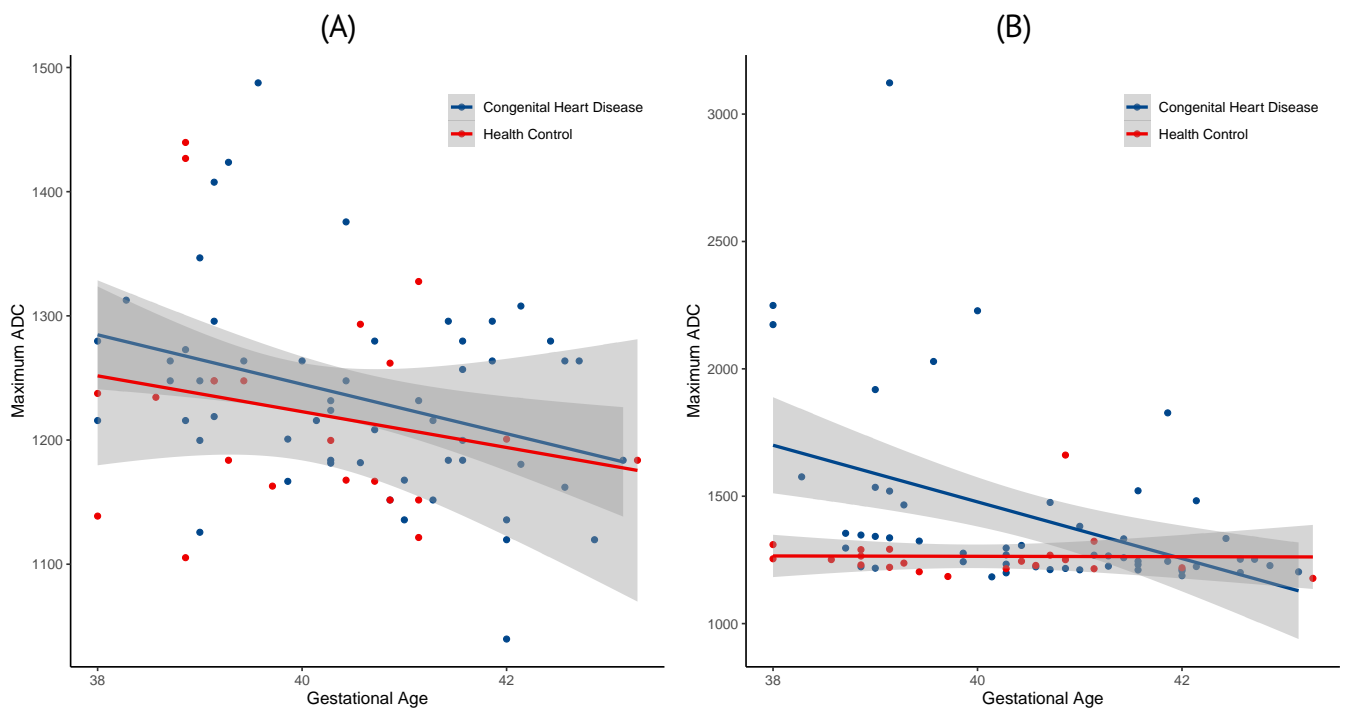

**Figure S22.** Regression analysis for the maximum of apparent diffusion coefficients with gestational age, comparing single- (A) and multi-slice (B) diffusion weighted imaging.

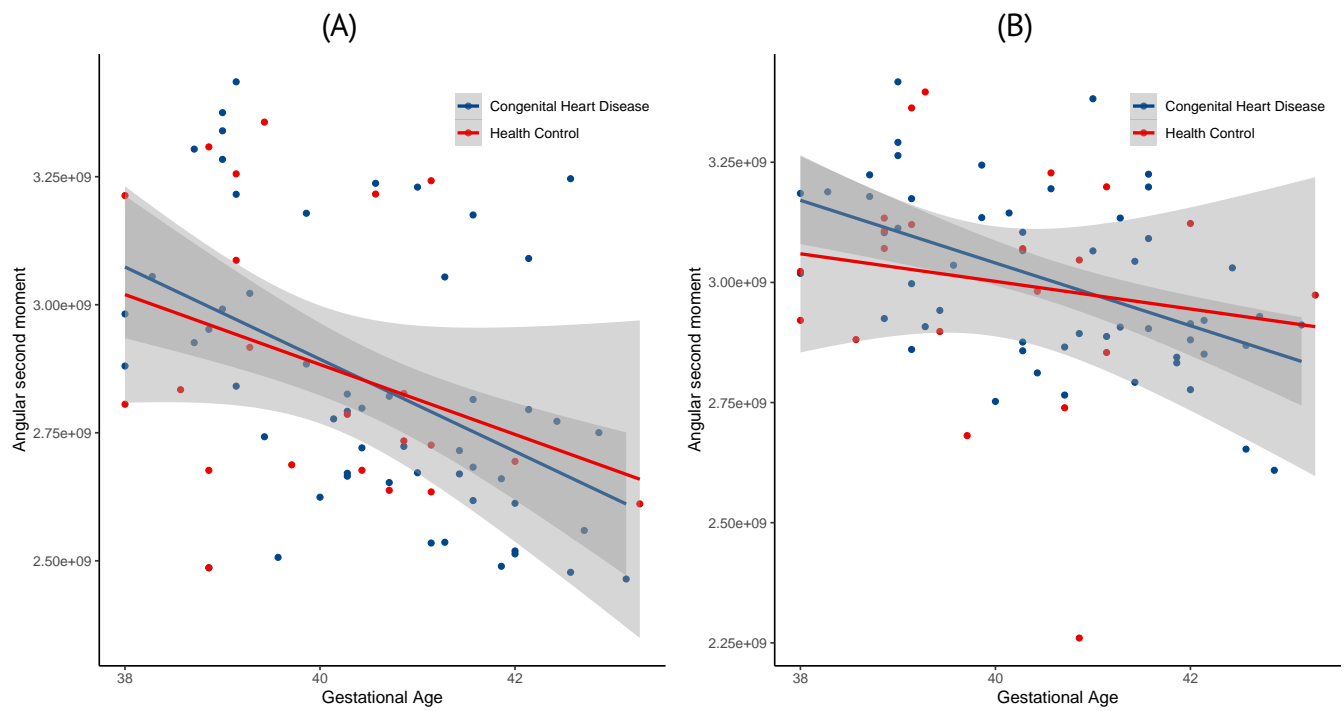

**Figure S23.** Regression analysis for the angular second moment with gestational age, comparing single- (A) and multi-slice (B) diffusion weighted imaging.

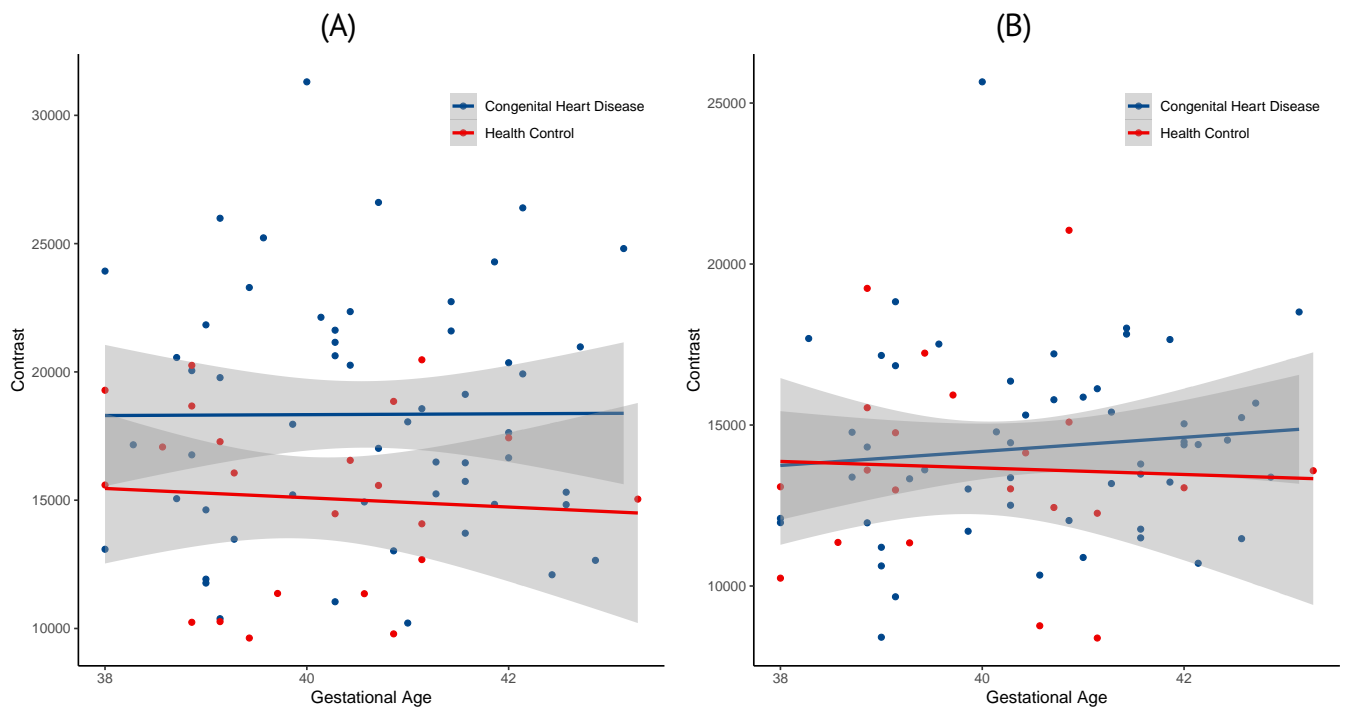

**Figure S24.** Regression analysis for the contrast with gestational age, comparing single- (A) and multi-slice (B) diffusion weighted imaging.

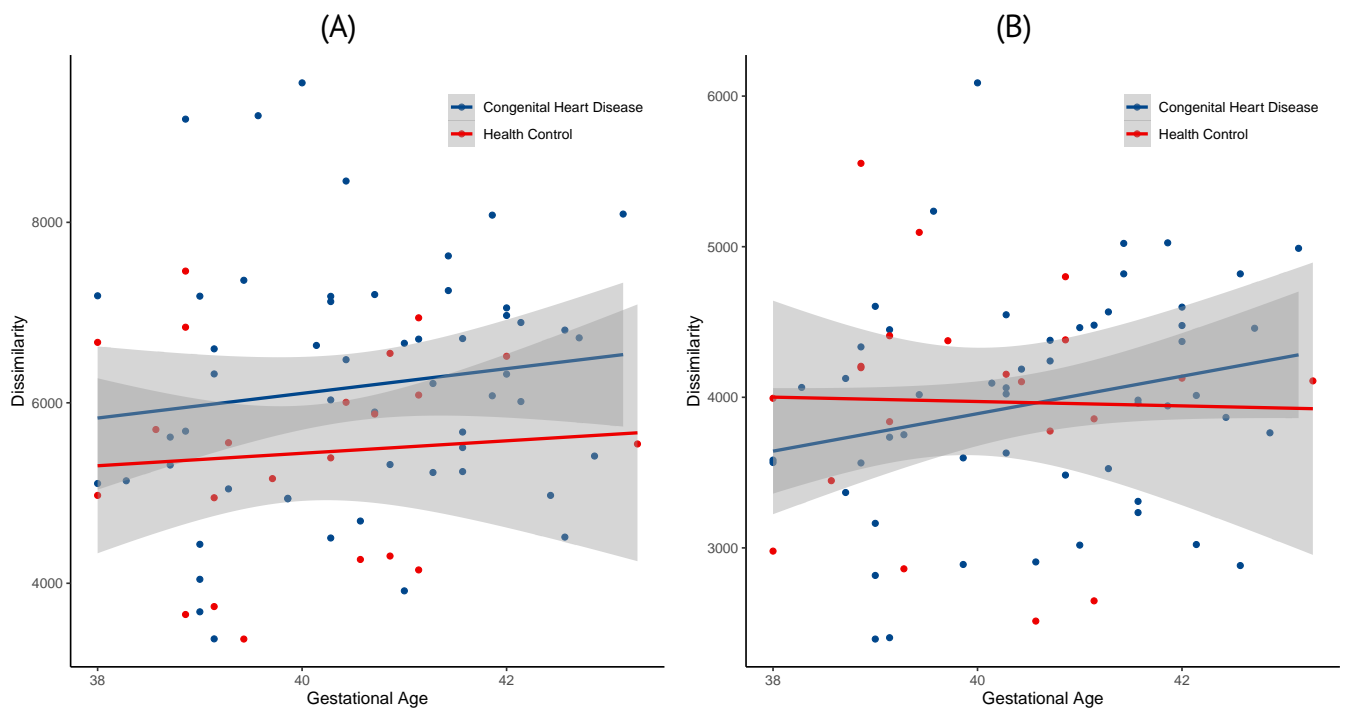

**Figure S25.** Regression analysis for the dissimilarity with gestational age, comparing single- (A) and multi-slice (B) diffusion weighted imaging.

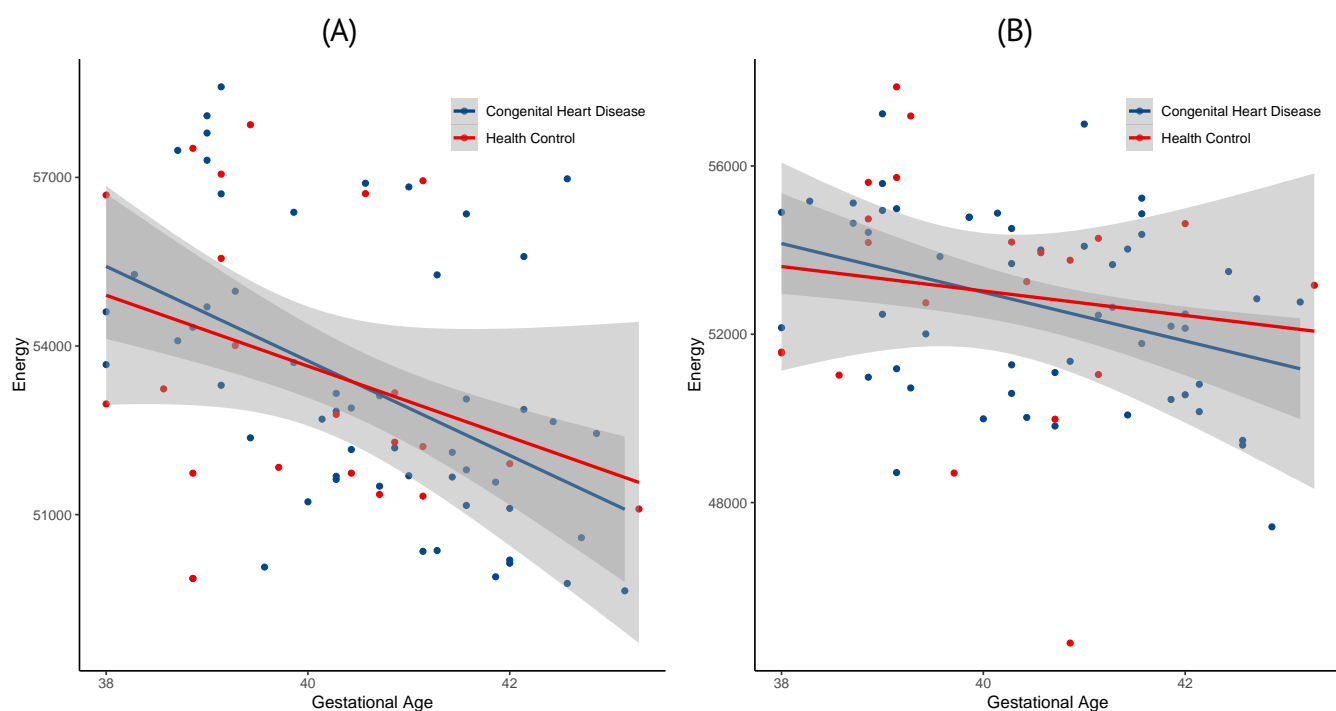

**Figure S26.** Regression analysis for the energy with gestational age, comparing single- (A) and multi-slice (B) diffusion weighted imaging.

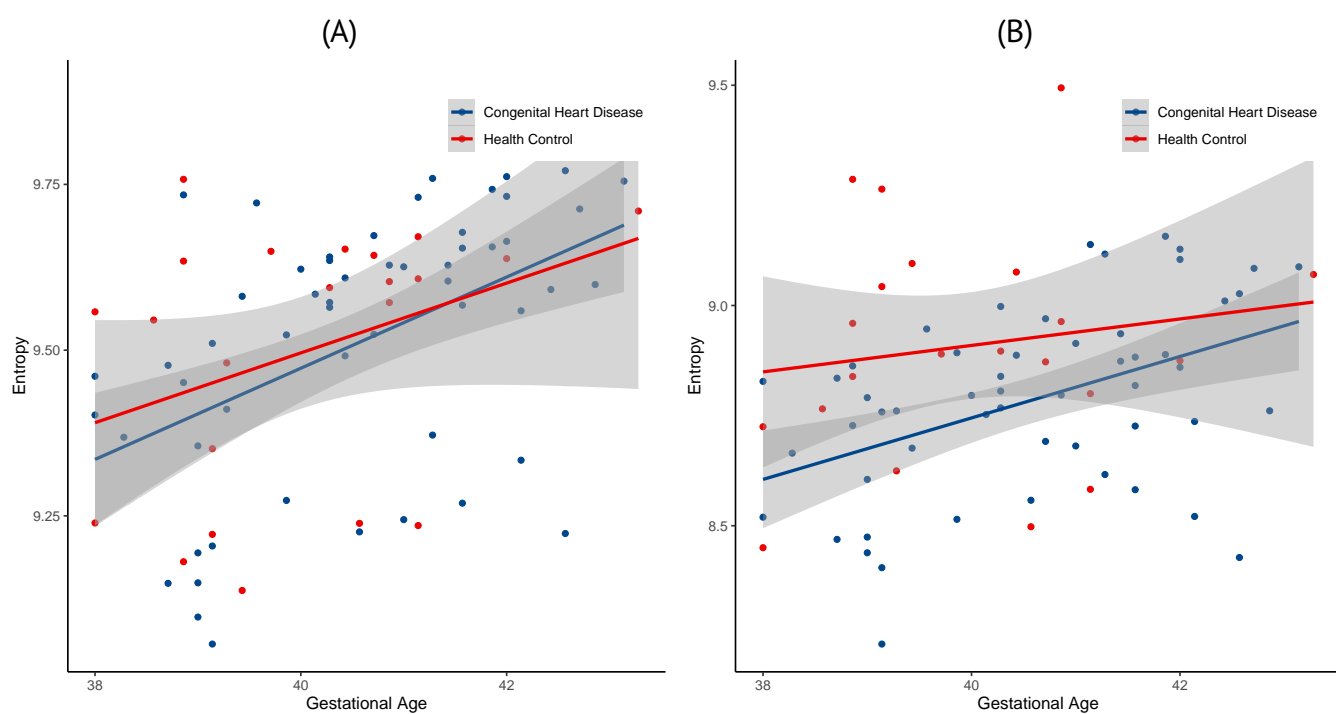

**Figure S27.** Regression analysis for the entropy with gestational age, comparing single- (A) and multi-slice (B) diffusion weighted imaging.



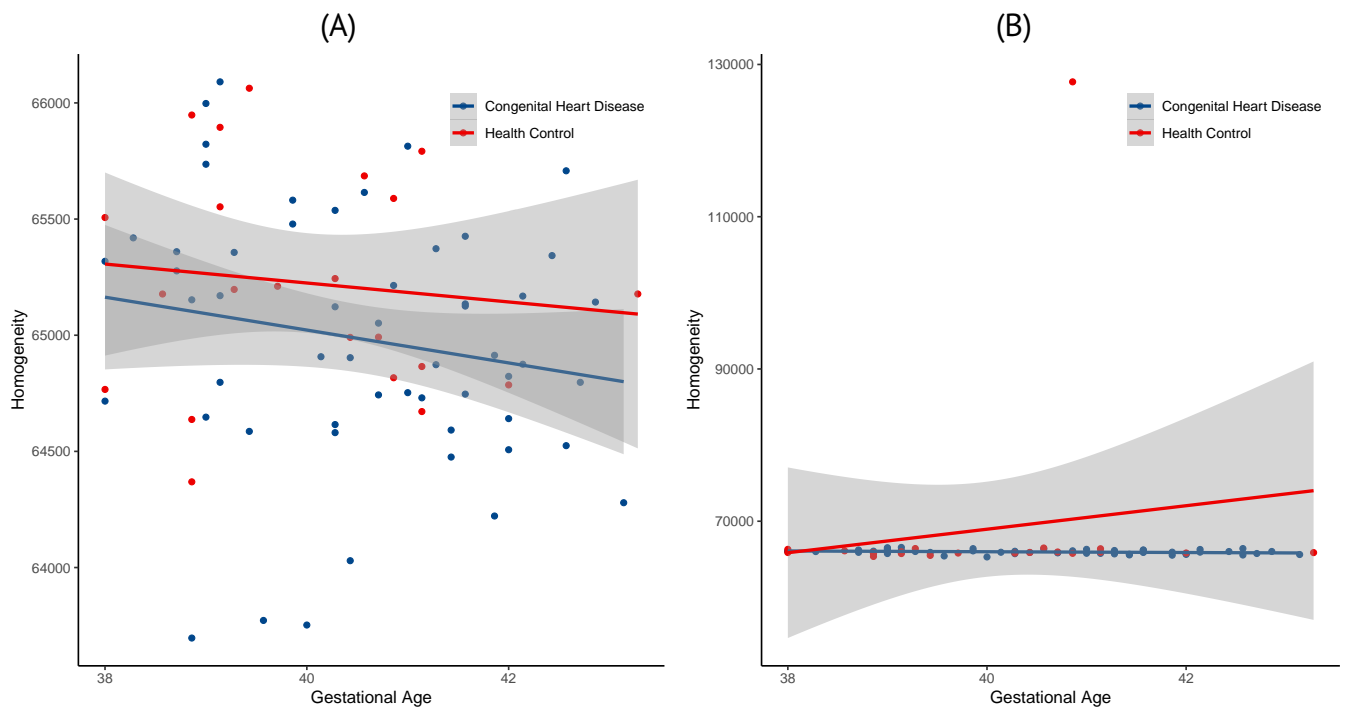

**Figure S28.** Regression analysis for the homogeneity with gestational age, comparing single- (A) and multi-slice (B) diffusion weighted imaging.

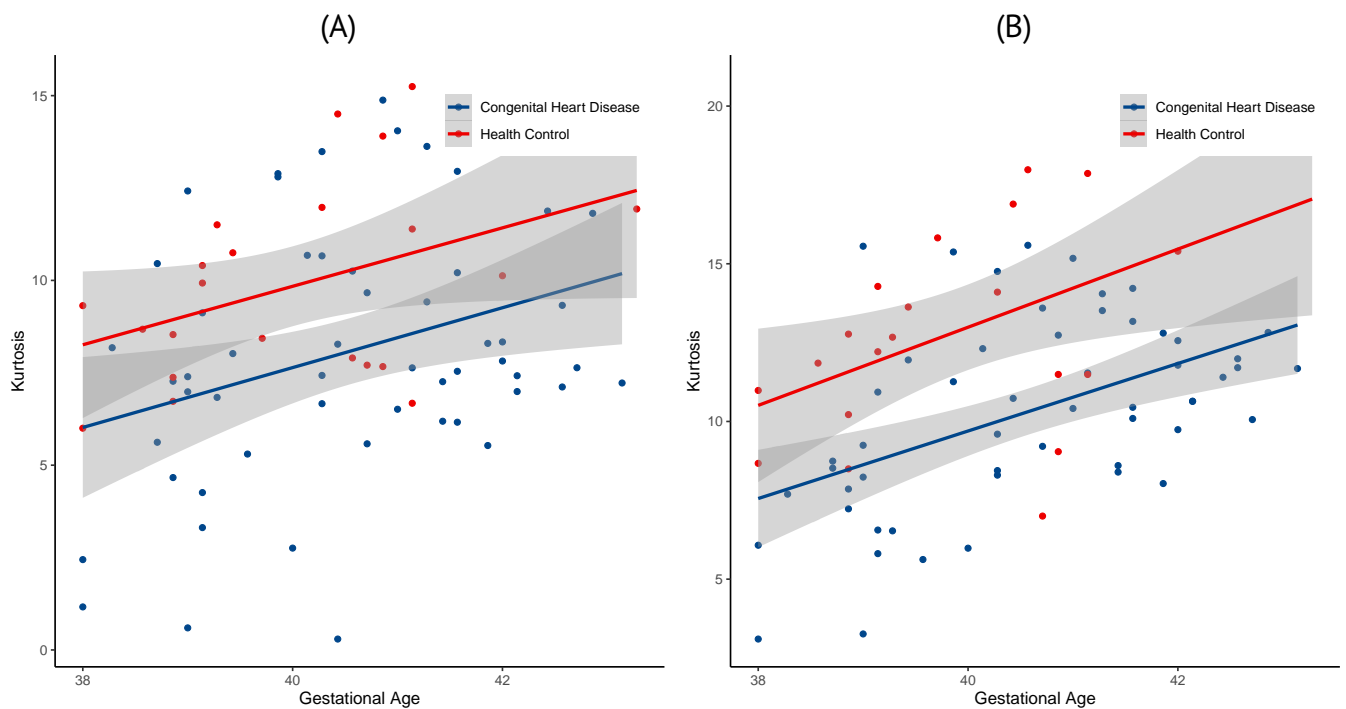

**Figure S29.** Regression analysis for the kurtosis with gestational age, comparing single- (A) and multi-slice (B) diffusion weighted imaging.

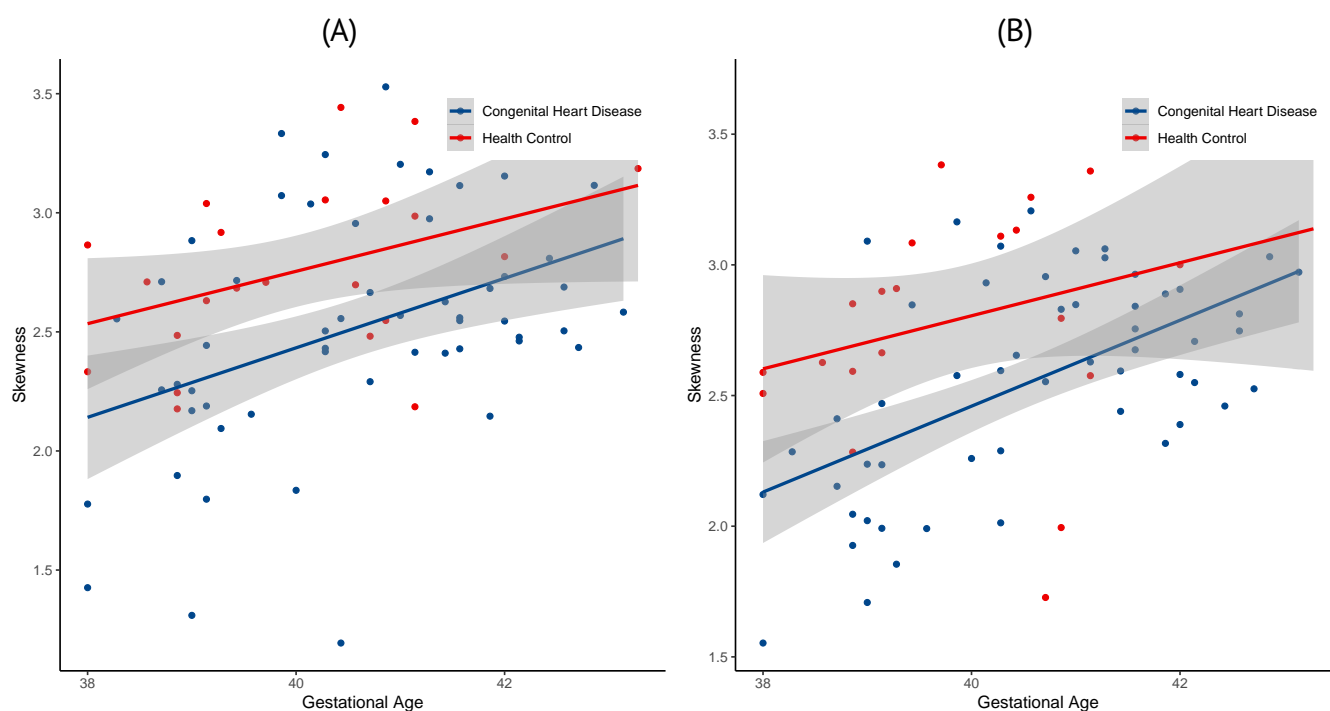

**Figure S30.** Regression analysis for the skewness with gestational age, comparing single- (A) and multi-slice (B) diffusion weighted imaging.

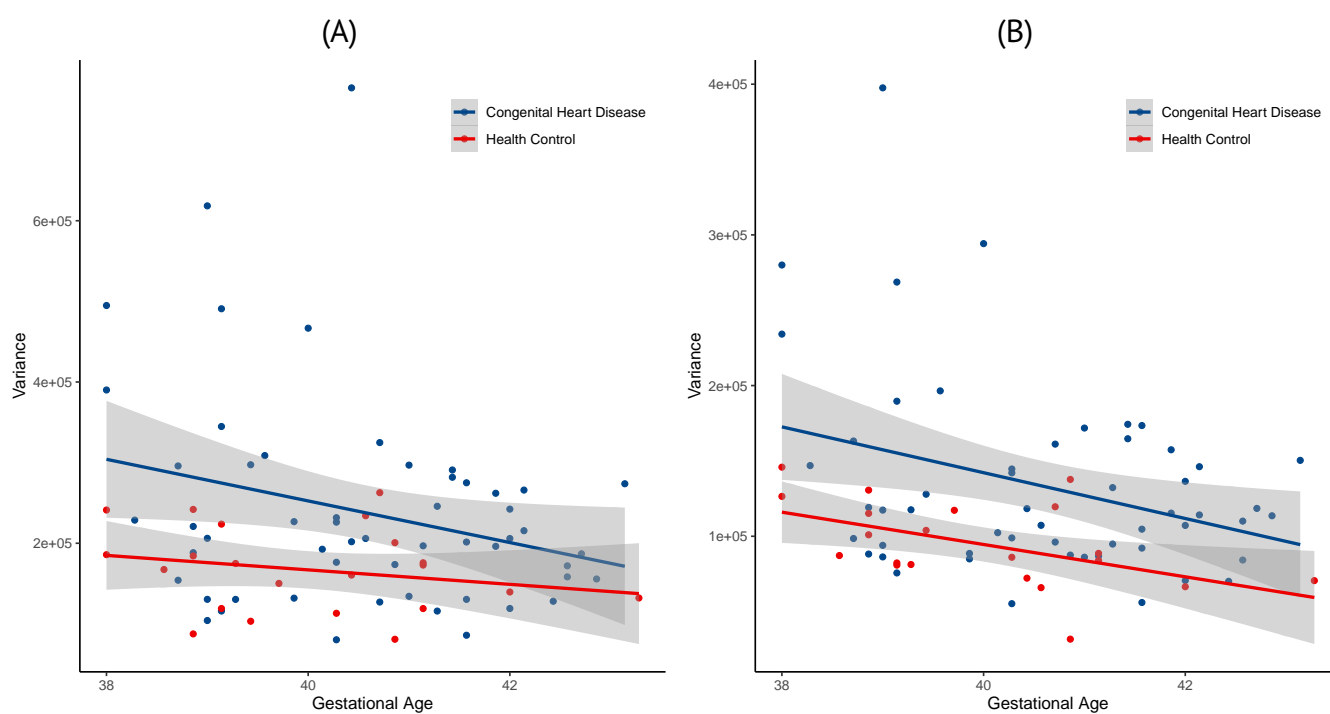

**Figure S31.** Regression analysis for the variance with gestational age, comparing single- (A) and multi-slice (B) diffusion weighted imaging.

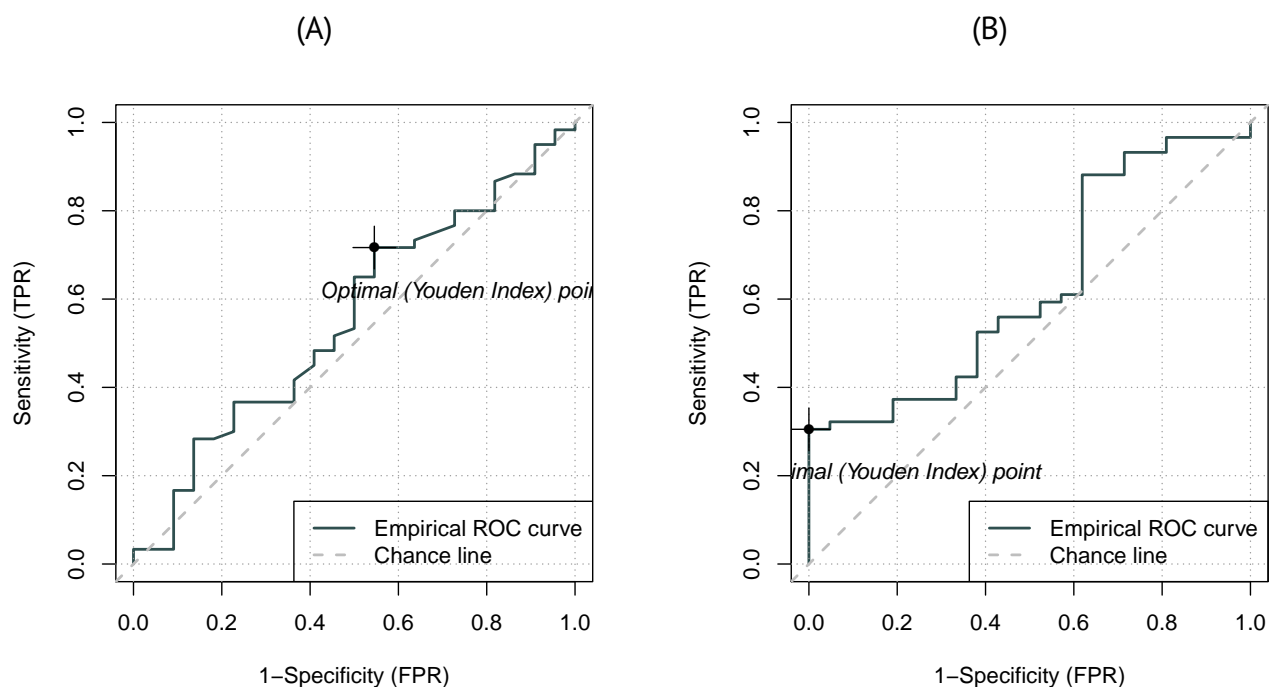

**Figure S32.** Receiver operating characteristics analysis with optimal point for the 5<sup>th</sup> percentile apparent diffusion coefficients in diagnosing congenital heart disease, comparing single- (A) and multi-slice (B) diffusion weighted imaging.

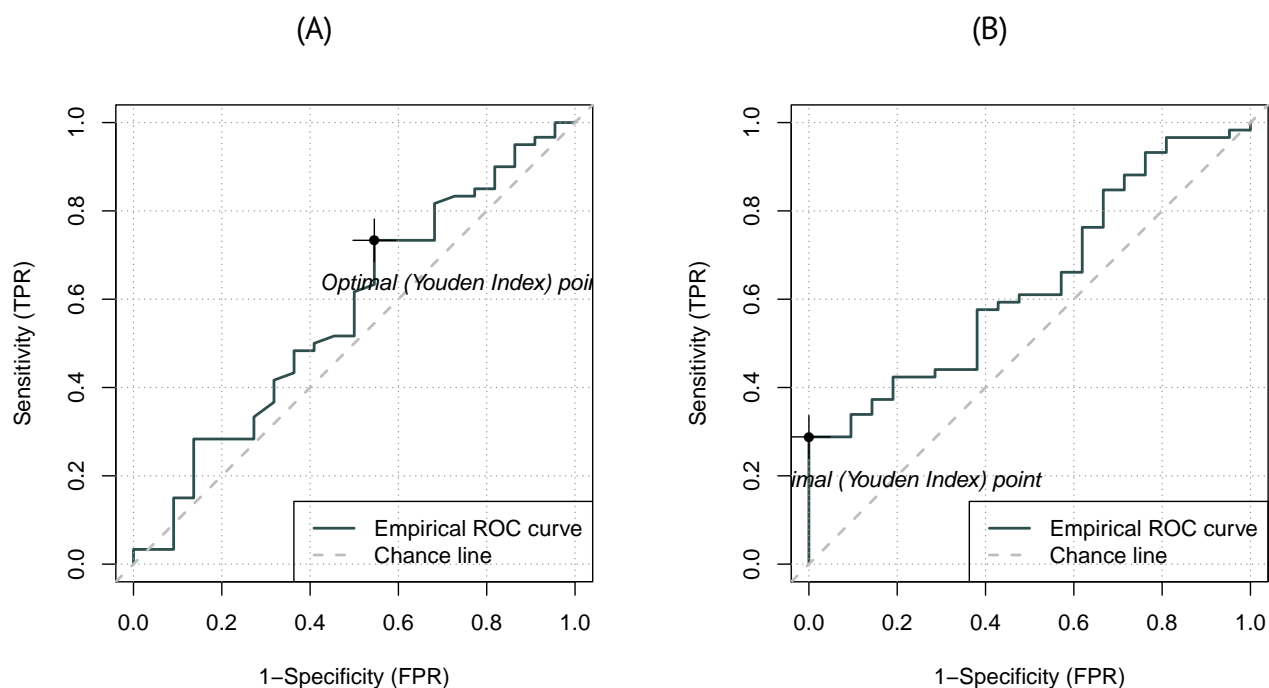

**Figure S33.** Receiver operating characteristics analysis with optimal point for the 10<sup>th</sup> percentile apparent diffusion coefficients in diagnosing congenital heart disease, comparing single- (A) and multi-slice (B) diffusion weighted imaging.

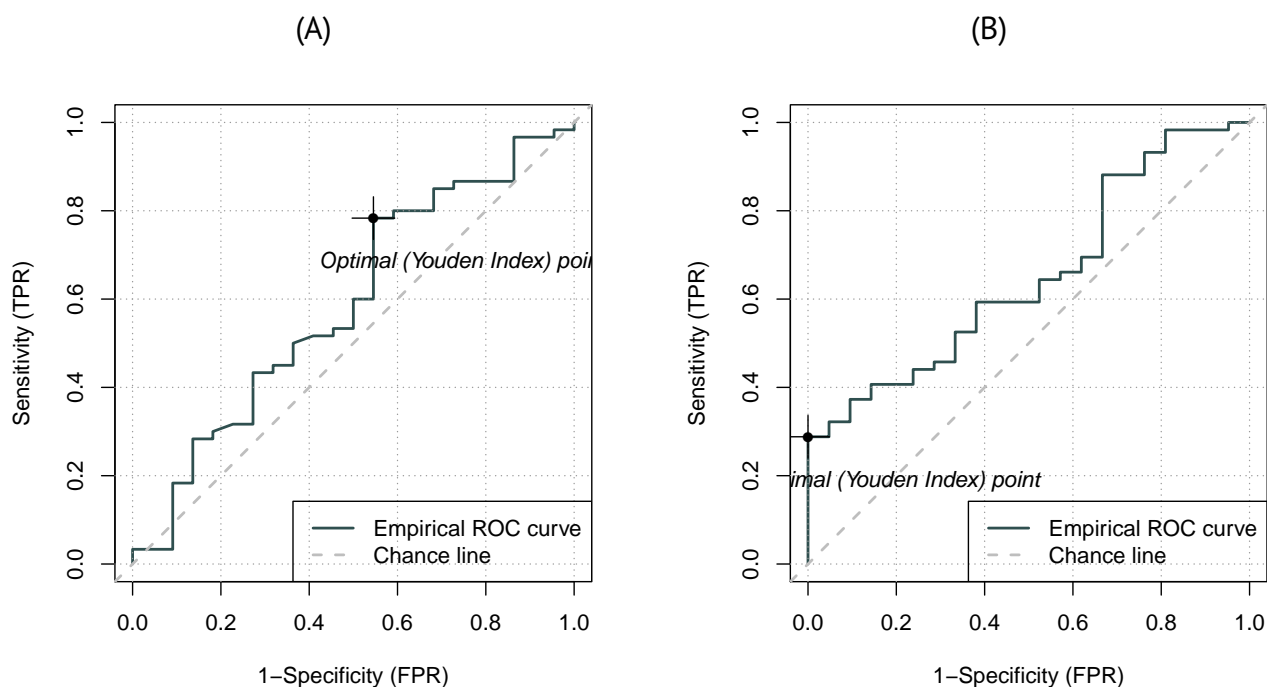

**Figure S34.** Receiver operating characteristics analysis with optimal point for the 15<sup>th</sup> percentile apparent diffusion coefficients in diagnosing congenital heart disease, comparing single- (A) and multi-slice (B) diffusion weighted imaging.

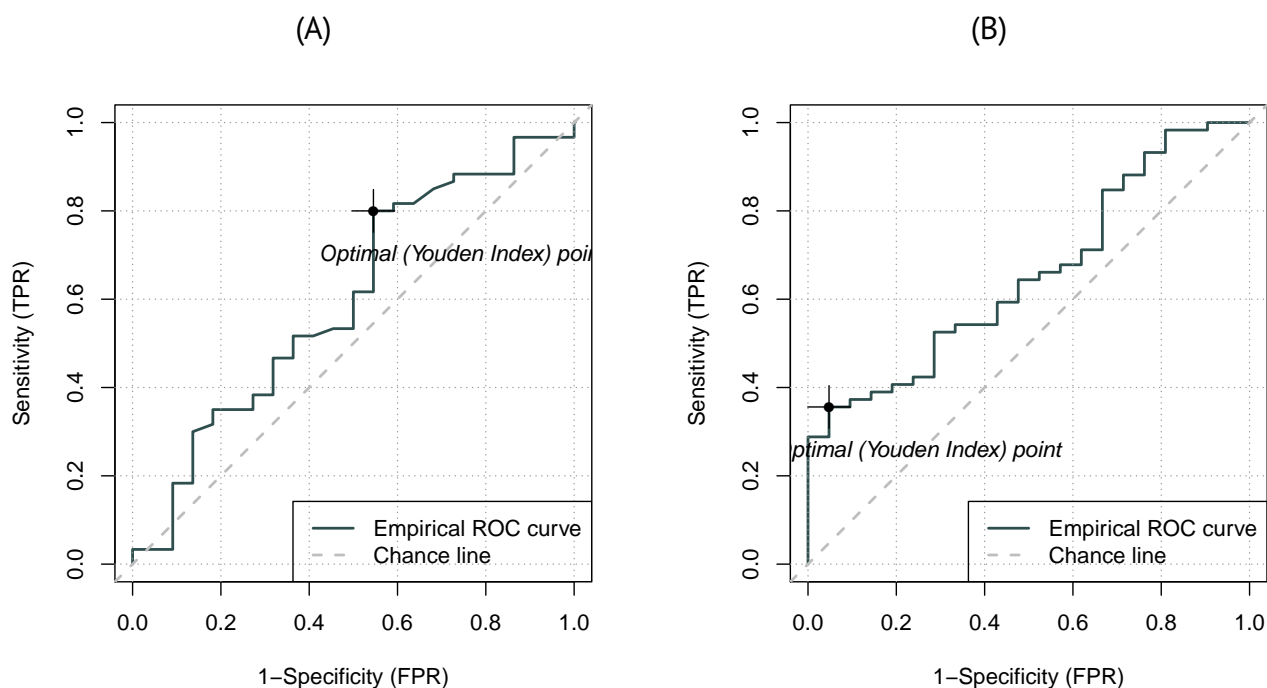

**Figure S35.** Receiver operating characteristics analysis with optimal point for the 20<sup>th</sup> percentile apparent diffusion coefficients in diagnosing congenital heart disease, comparing single- (A) and multi-slice (B) diffusion weighted imaging.

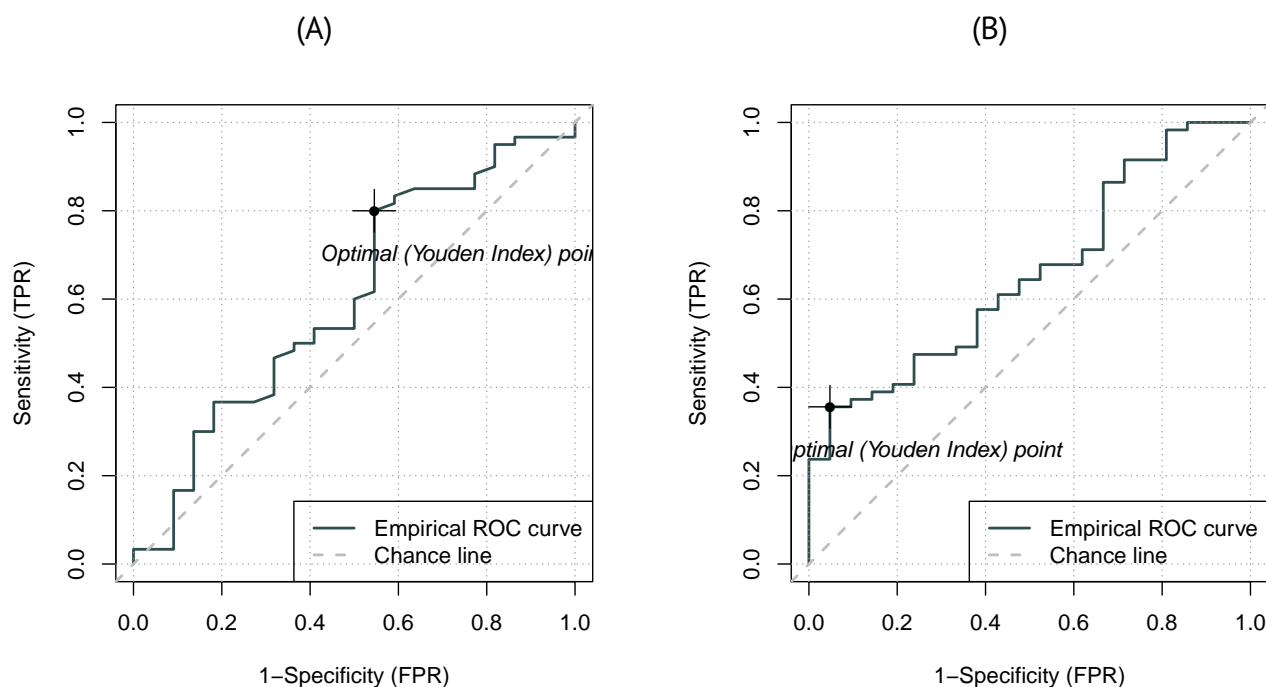

**Figure S36.** Receiver operating characteristics analysis with optimal point for the 25<sup>th</sup> percentile apparent diffusion coefficients in diagnosing congenital heart disease, comparing single- (A) and multi-slice (B) diffusion weighted imaging.

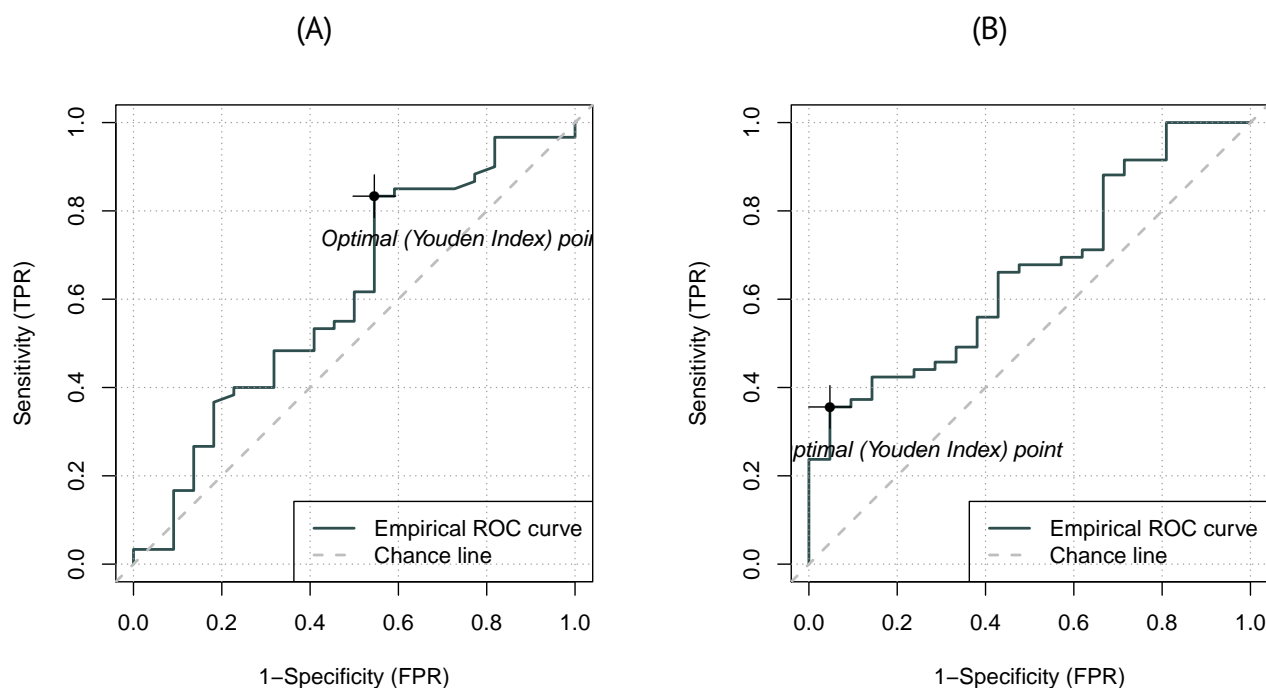

**Figure S37.** Receiver operating characteristics analysis with optimal point for the 30<sup>th</sup> percentile apparent diffusion coefficients in diagnosing congenital heart disease, comparing single- (A) and multi-slice (B) diffusion weighted imaging.

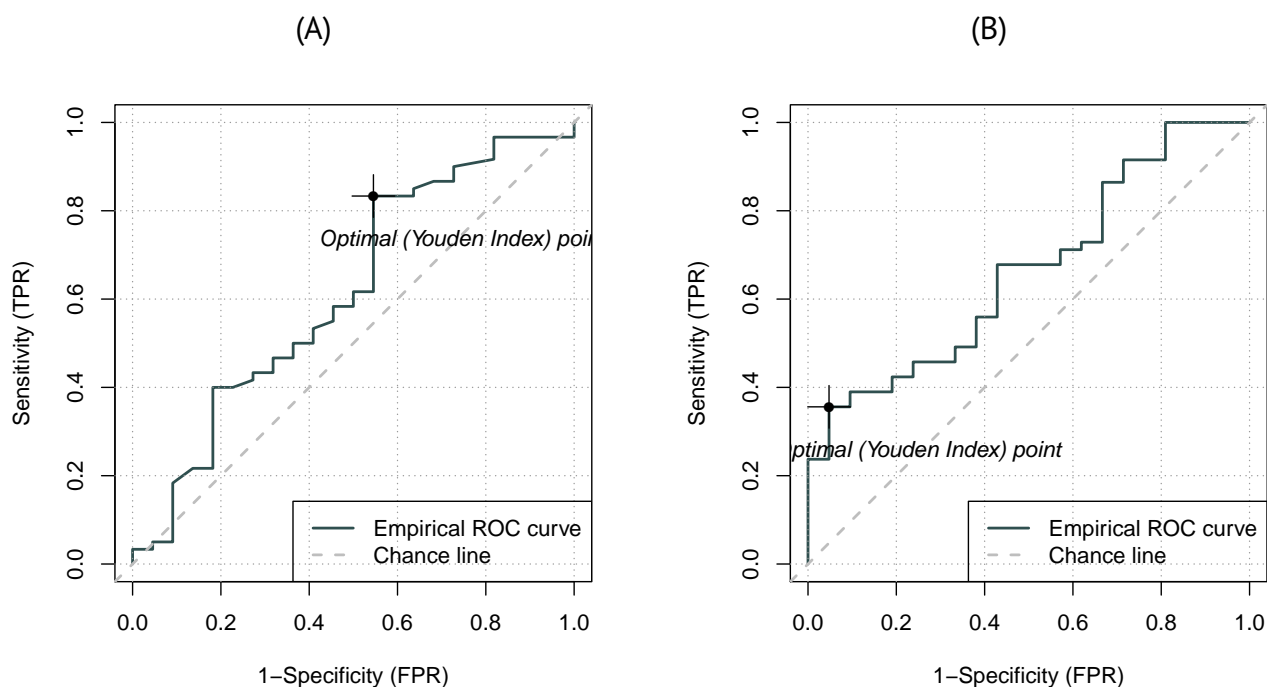

**Figure S38.** Receiver operating characteristics analysis with optimal point for the 35<sup>th</sup> percentile apparent diffusion coefficients in diagnosing congenital heart disease, comparing single- (A) and multi-slice (B) diffusion weighted imaging.

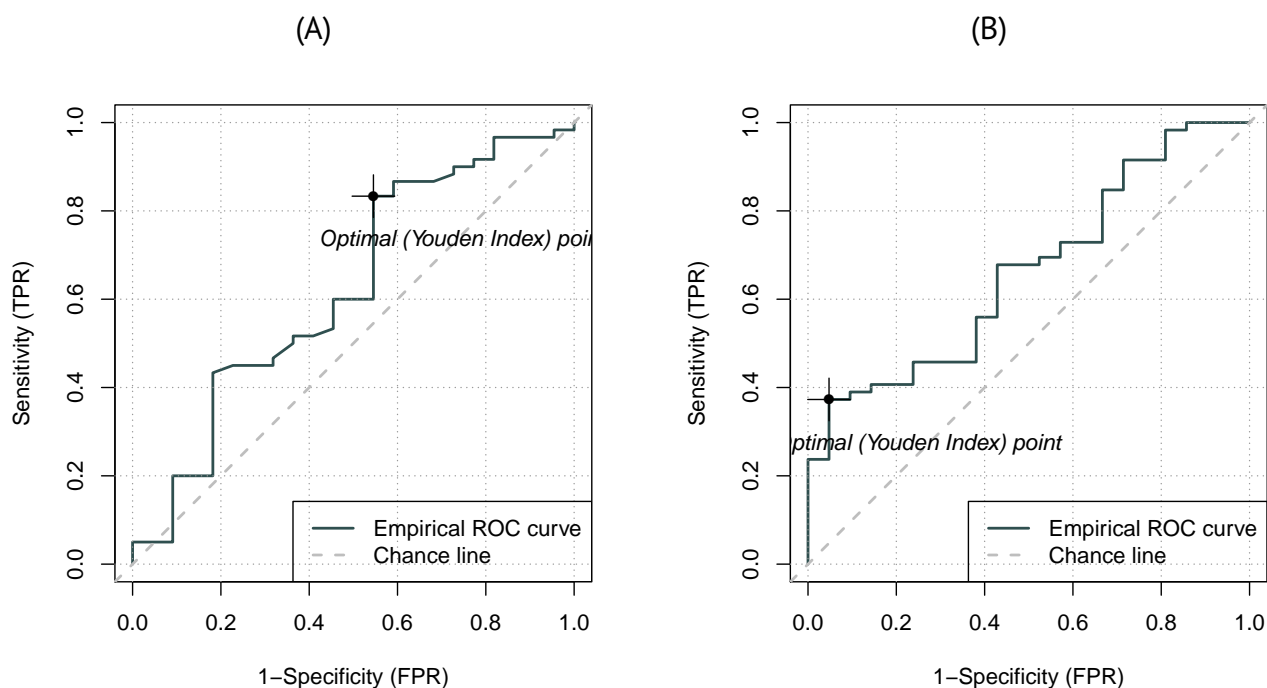

**Figure S39.** Receiver operating characteristics analysis with optimal point for the 40<sup>th</sup> percentile apparent diffusion coefficients in diagnosing congenital heart disease, comparing single- (A) and multi-slice (B) diffusion weighted imaging.

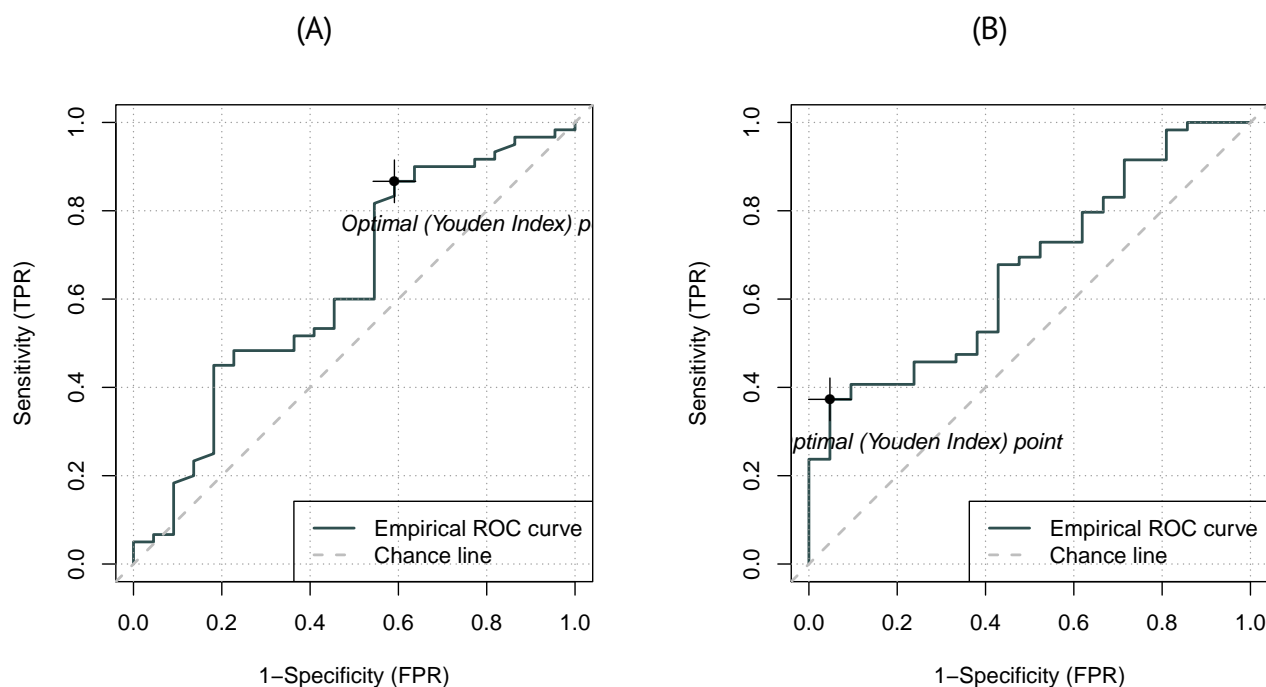

**Figure S40.** Receiver operating characteristics analysis with optimal point for the 45<sup>th</sup> percentile apparent diffusion coefficients in diagnosing congenital heart disease, comparing single- (A) and multi-slice (B) diffusion weighted imaging.

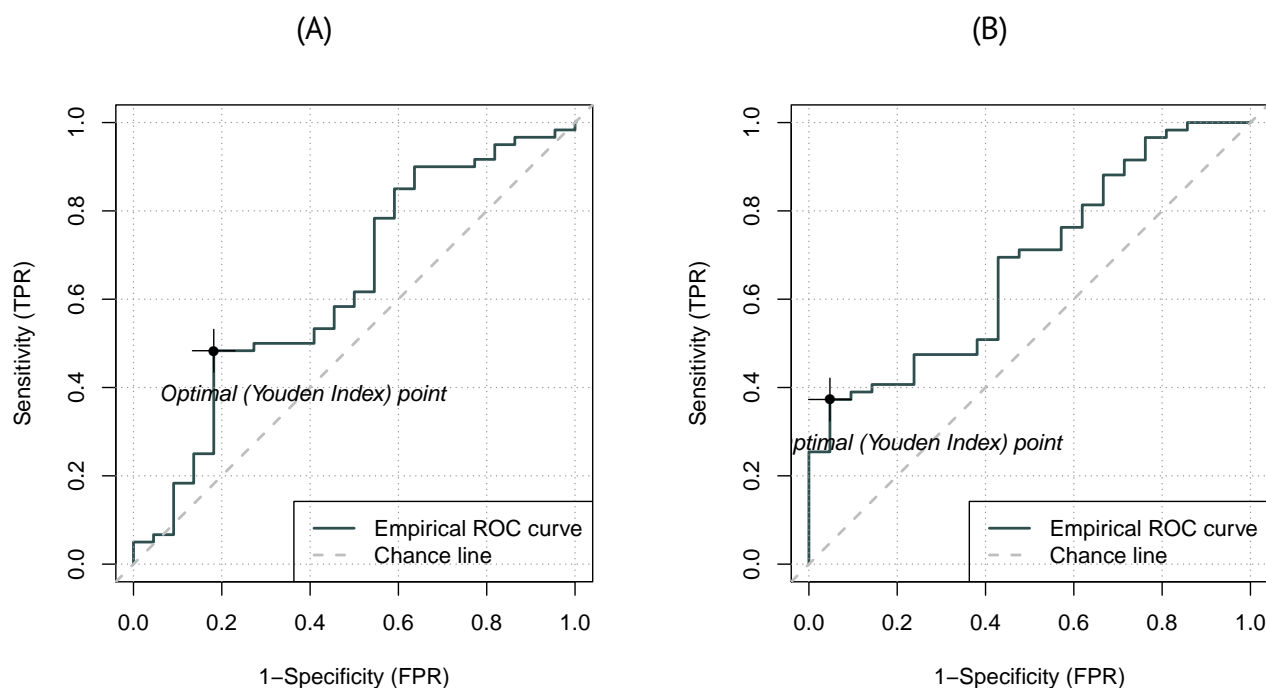

**Figure S41.** Receiver operating characteristics analysis with optimal point for the 50<sup>th</sup> percentile apparent diffusion coefficients in diagnosing congenital heart disease, comparing single- (A) and multi-slice (B) diffusion weighted imaging.

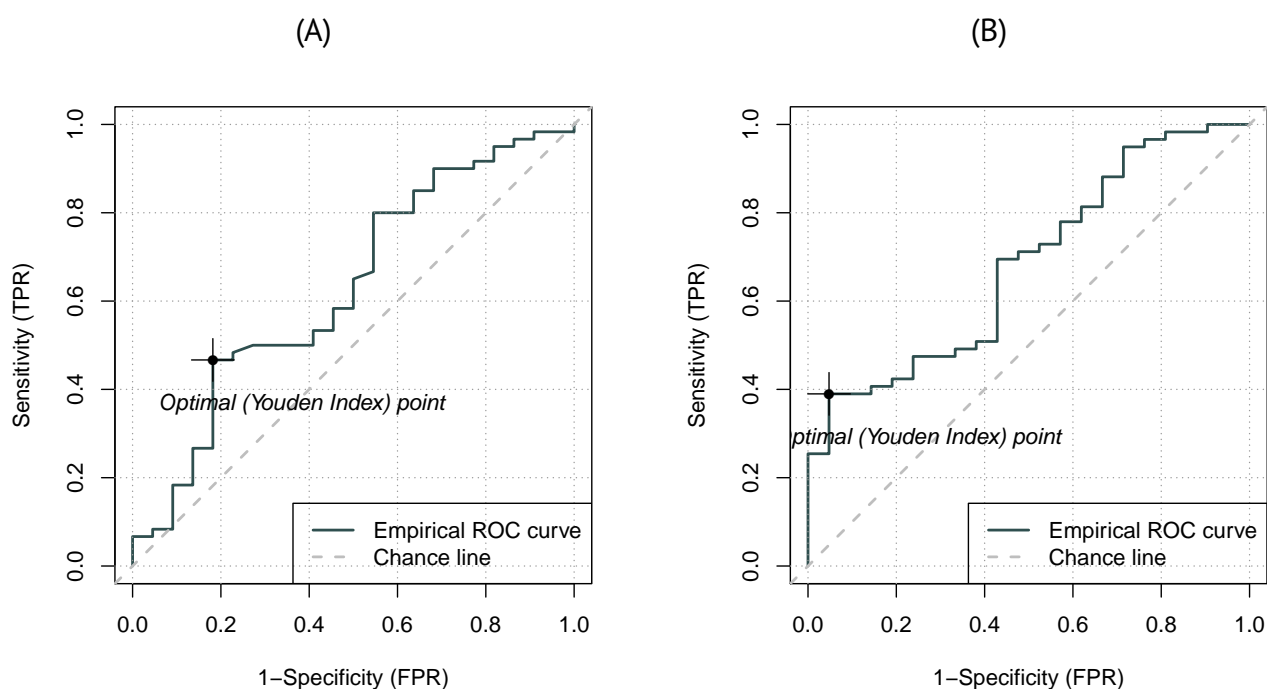

**Figure S42.** Receiver operating characteristics analysis with optimal point for the 55<sup>th</sup> percentile apparent diffusion coefficients in diagnosing congenital heart disease, comparing single- (A) and multi-slice (B) diffusion weighted imaging.

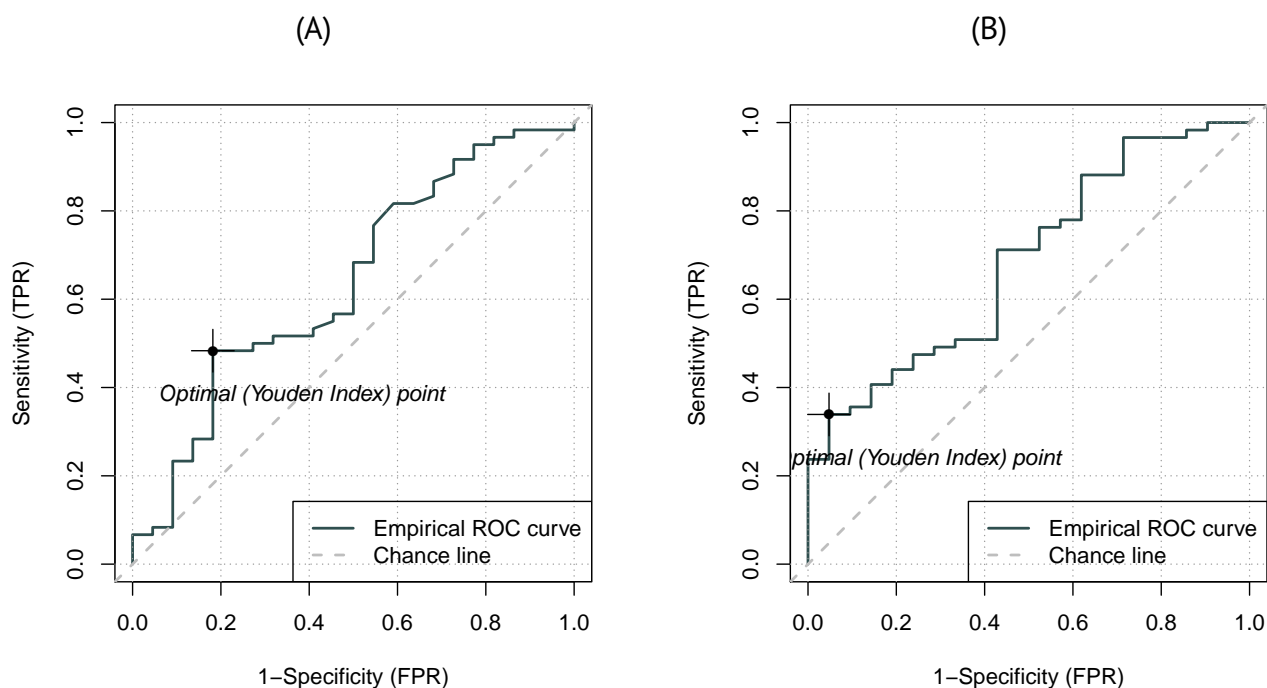

**Figure S43.** Receiver operating characteristics analysis with optimal point for the 60<sup>th</sup> percentile apparent diffusion coefficients in diagnosing congenital heart disease, comparing single- (A) and multi-slice (B) diffusion weighted imaging.



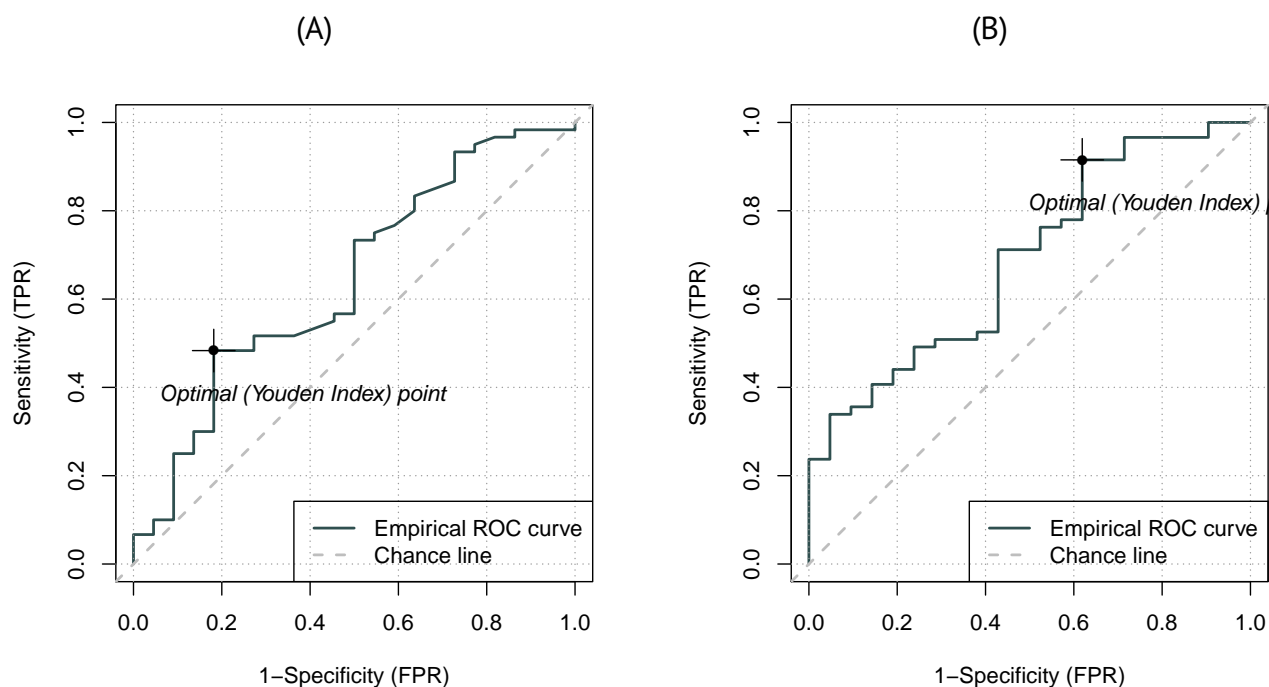

**Figure S44.** Receiver operating characteristics analysis with optimal point for the 65<sup>th</sup> percentile apparent diffusion coefficients in diagnosing congenital heart disease, comparing single- (A) and multi-slice (B) diffusion weighted imaging.

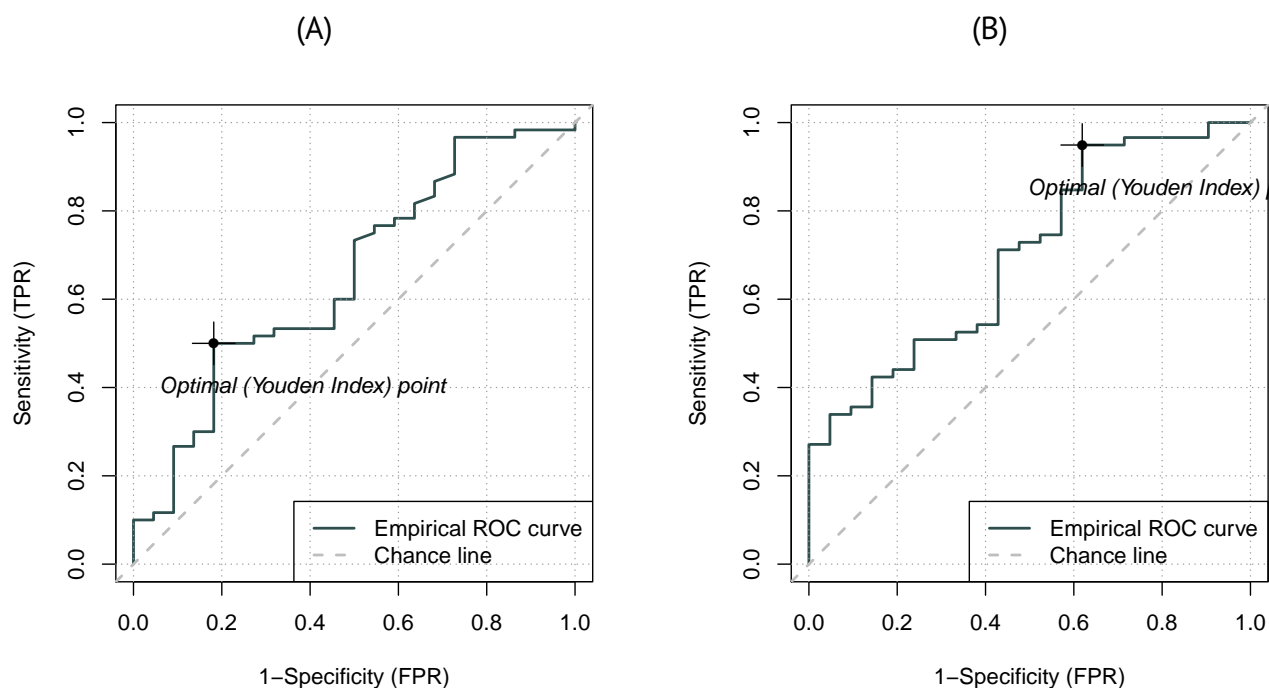

**Figure S45.** Receiver operating characteristics analysis with optimal point for the 70<sup>th</sup> percentile apparent diffusion coefficients in diagnosing congenital heart disease, comparing single- (A) and multi-slice (B) diffusion weighted imaging.

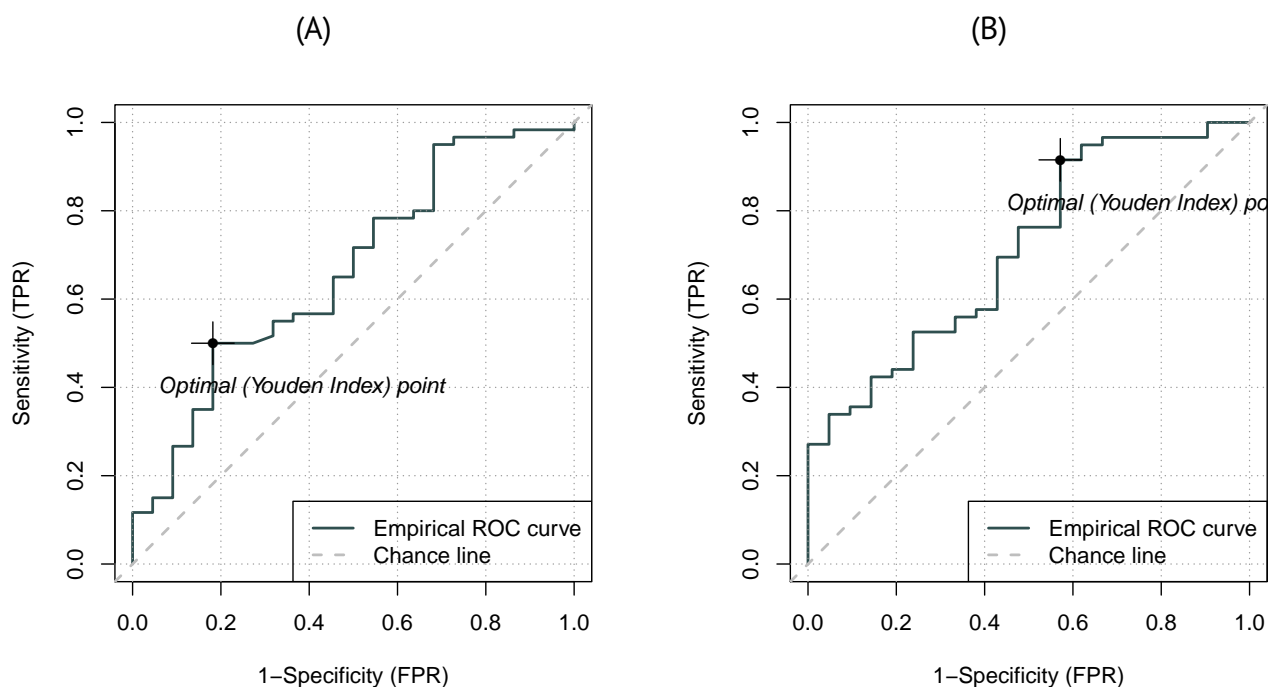

**Figure S46.** Receiver operating characteristics analysis with optimal point for the 75<sup>th</sup> percentile apparent diffusion coefficients in diagnosing congenital heart disease, comparing single- (A) and multi-slice (B) diffusion weighted imaging.

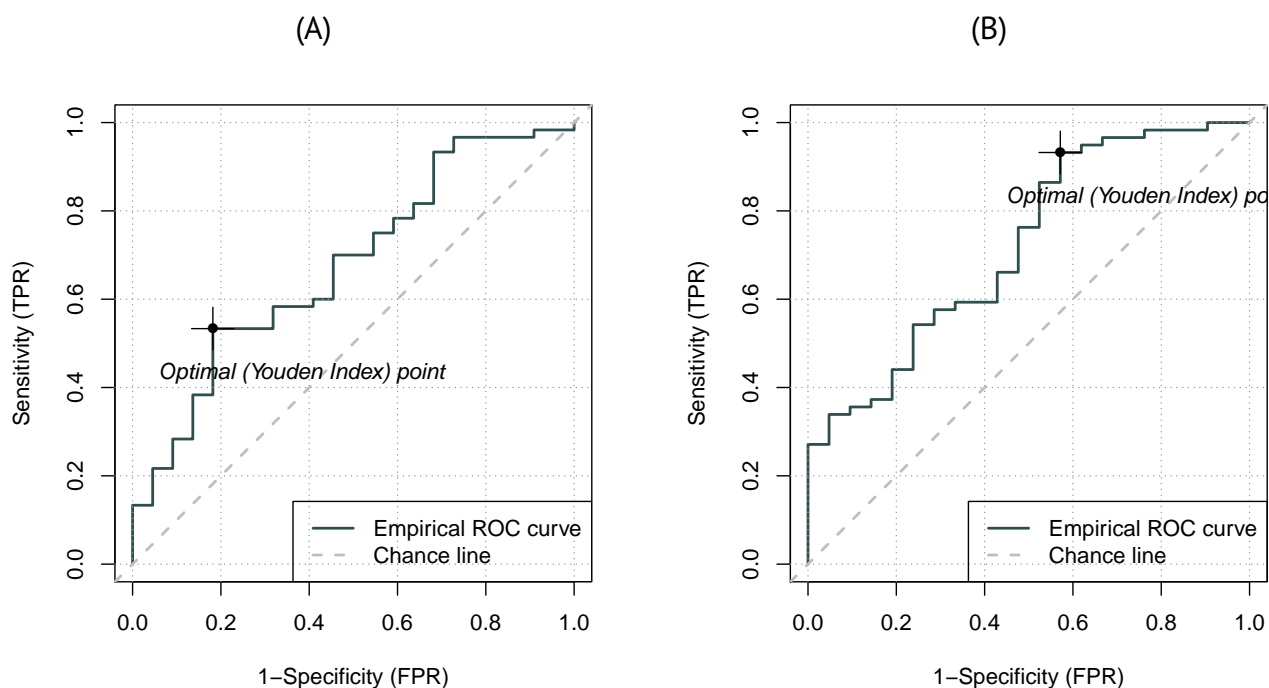

**Figure S47.** Receiver operating characteristics analysis with optimal point for the 80<sup>th</sup> percentile apparent diffusion coefficients in diagnosing congenital heart disease, comparing single- (A) and multi-slice (B) diffusion weighted imaging.

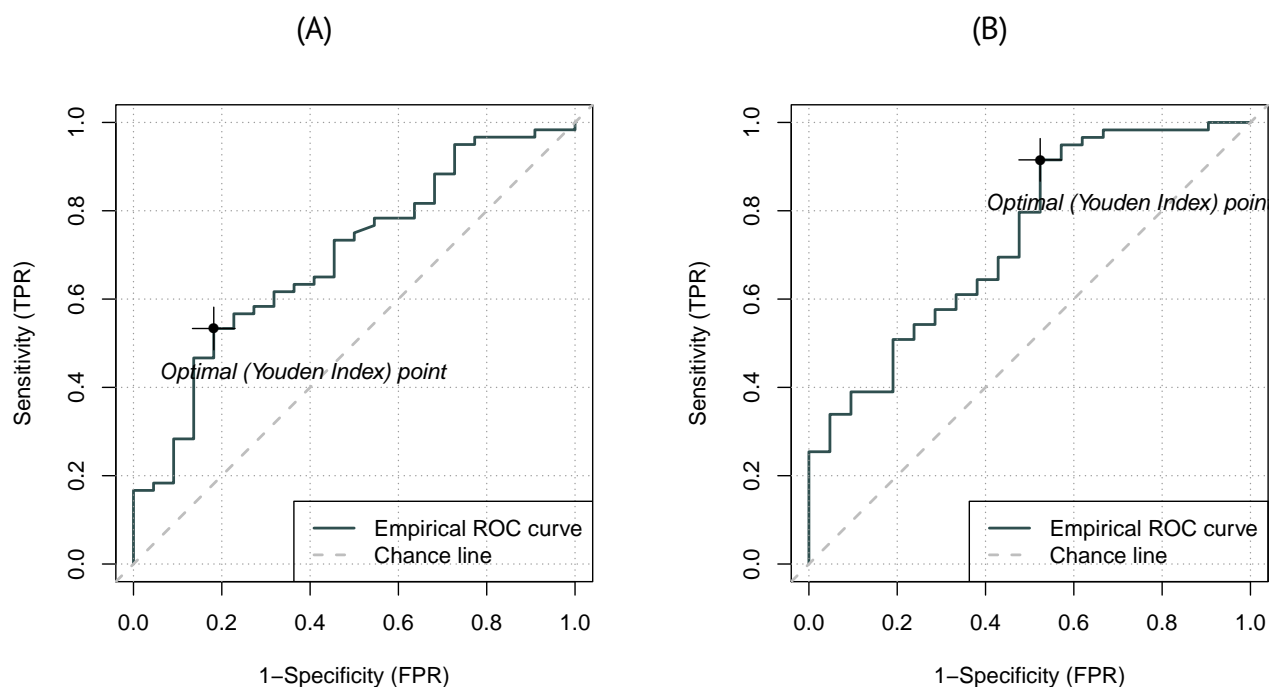

**Figure S48.** Receiver operating characteristics analysis with optimal point for the 85<sup>th</sup> percentile apparent diffusion coefficients in diagnosing congenital heart disease, comparing single- (A) and multi-slice (B) diffusion weighted imaging.

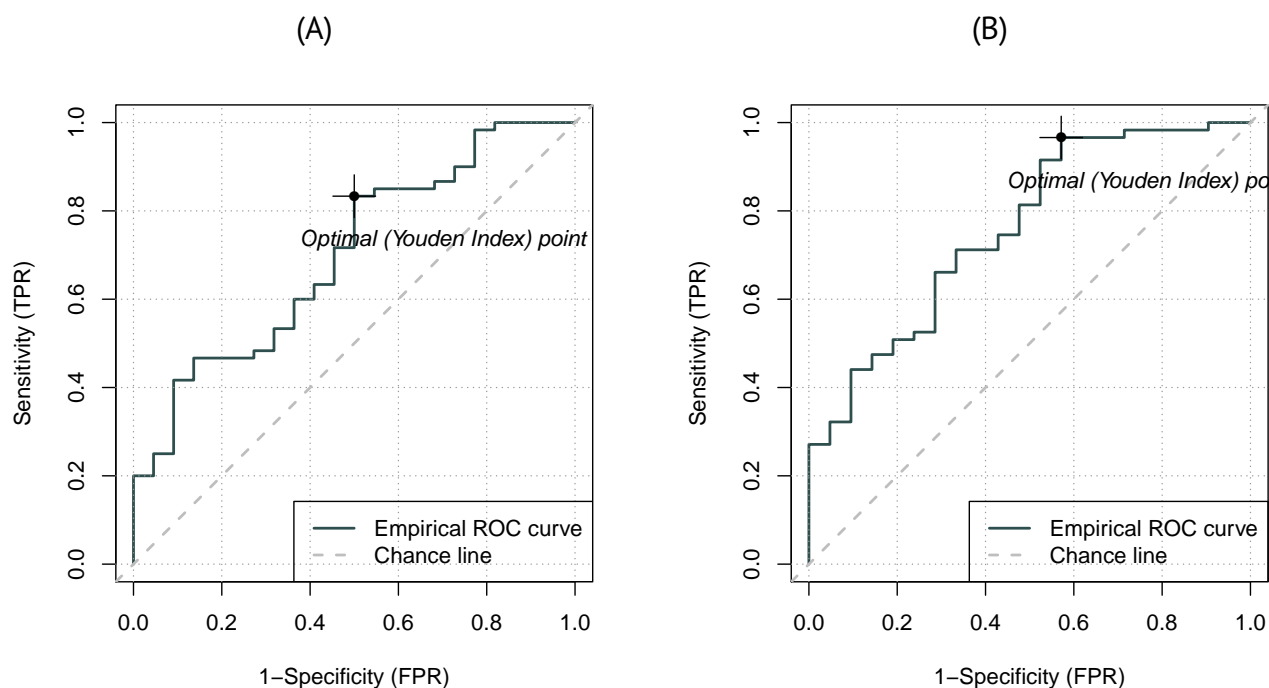

**Figure S49.** Receiver operating characteristics analysis with optimal point for the 90<sup>th</sup> percentile apparent diffusion coefficients in diagnosing congenital heart disease, comparing single- (A) and multi-slice (B) diffusion weighted imaging.

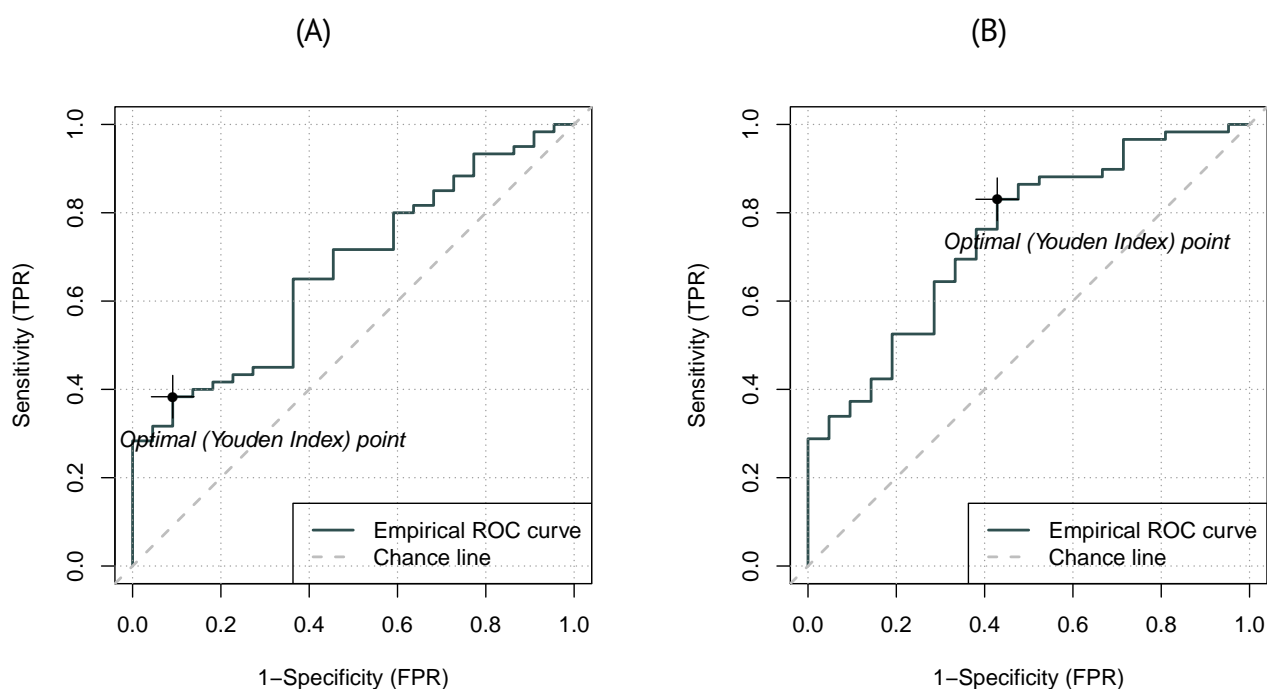

**Figure S50.** Receiver operating characteristics analysis with optimal point for the 95<sup>th</sup> percentile apparent diffusion coefficients in diagnosing congenital heart disease, comparing single- (A) and multi-slice (B) diffusion weighted imaging.

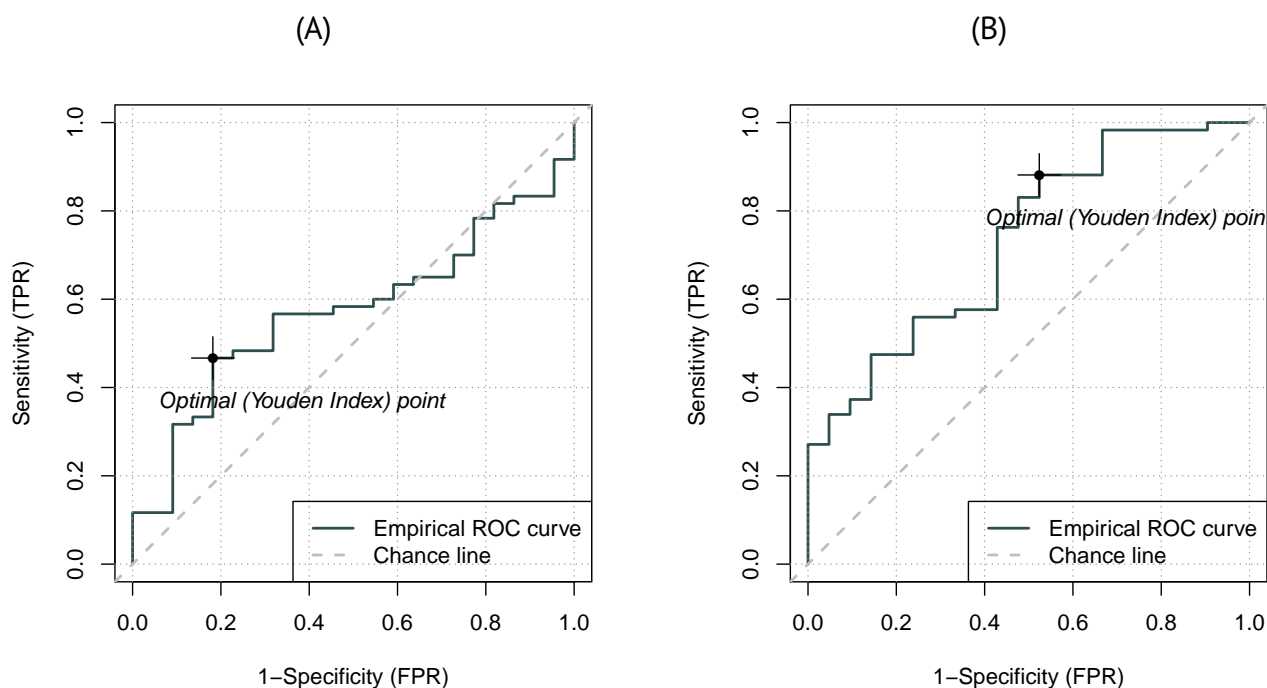

**Figure S51.** Receiver operating characteristics analysis with optimal point for the mean of apparent diffusion coefficients in diagnosing congenital heart disease, comparing single- (A) and multi-slice (B) diffusion weighted imaging.

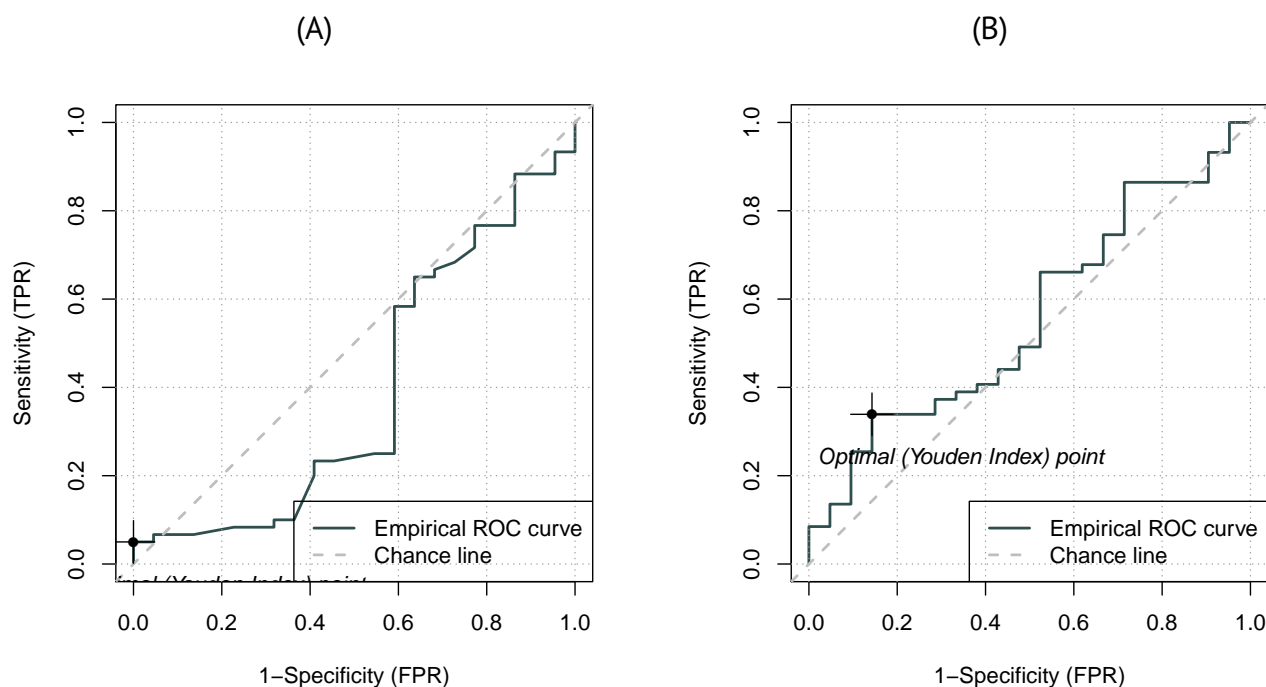

**Figure S52.** Receiver operating characteristics analysis with optimal point for the minimum of apparent diffusion coefficients in diagnosing congenital heart disease, comparing single- (A) and multi-slice (B) diffusion weighted imaging.

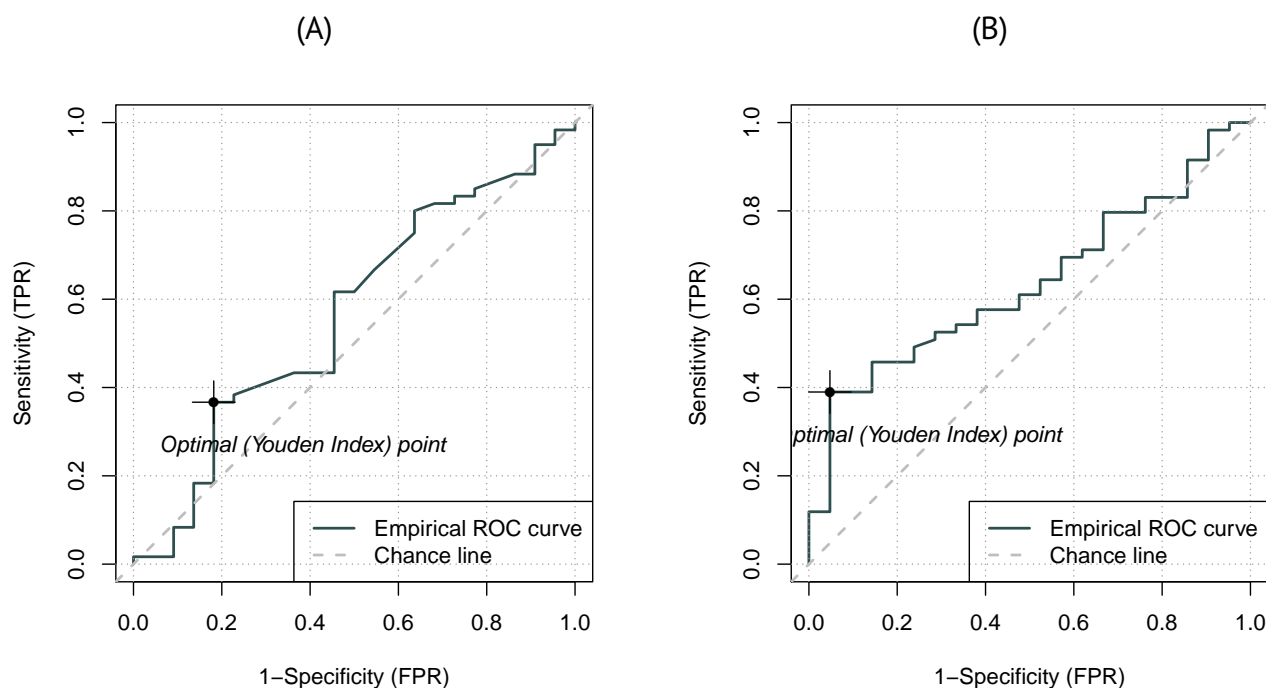

**Figure S53.** Receiver operating characteristics analysis with optimal point for the maximum of apparent diffusion coefficients in diagnosing congenital heart disease, comparing single- (A) and multi-slice (B) diffusion weighted imaging.

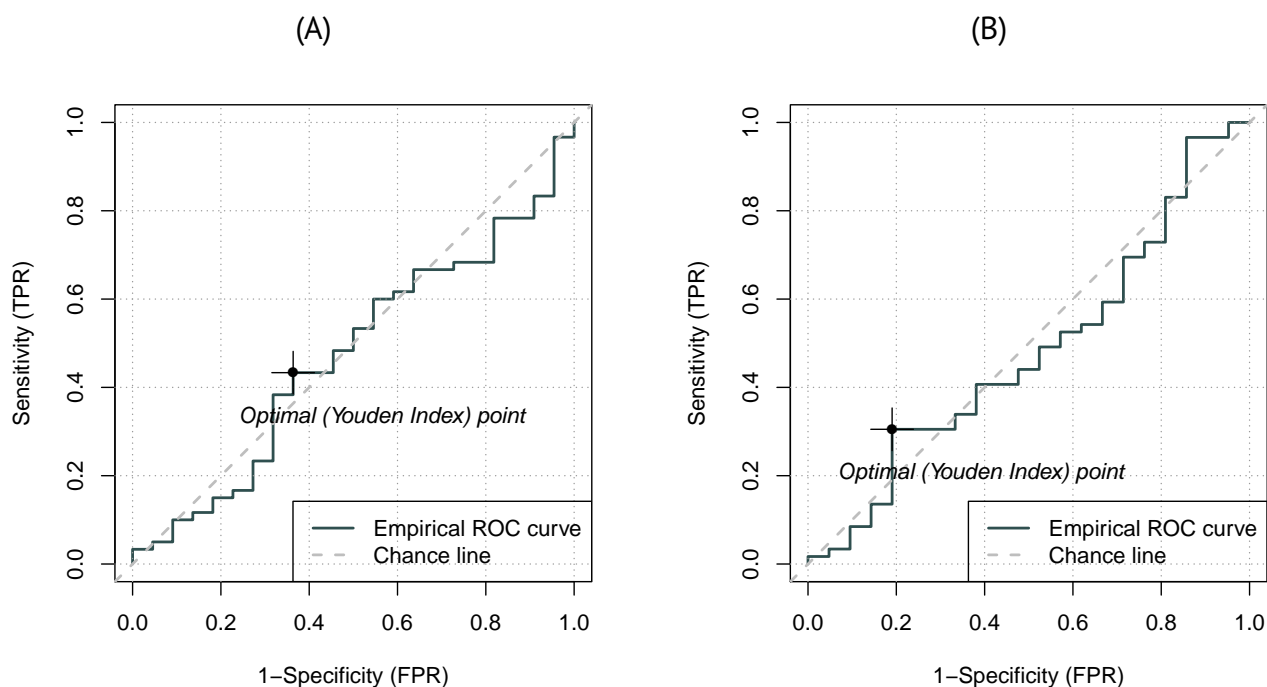

**Figure S54.** Receiver operating characteristics analysis with optimal point for the angular second moment in diagnosing congenital heart disease, comparing single- (A) and multi-slice (B) diffusion weighted imaging.

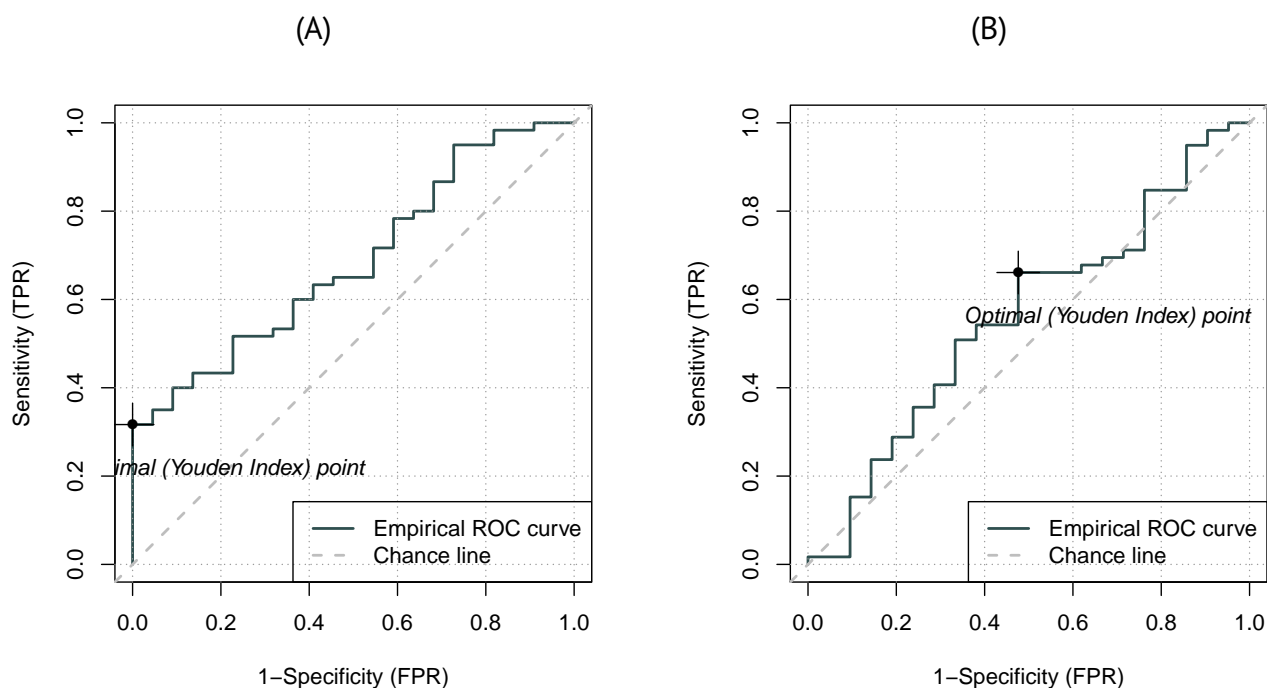

**Figure S55.** Receiver operating characteristics analysis with optimal point for the contrast in diagnosing congenital heart disease, comparing single- (A) and multi-slice (B) diffusion weighted imaging.

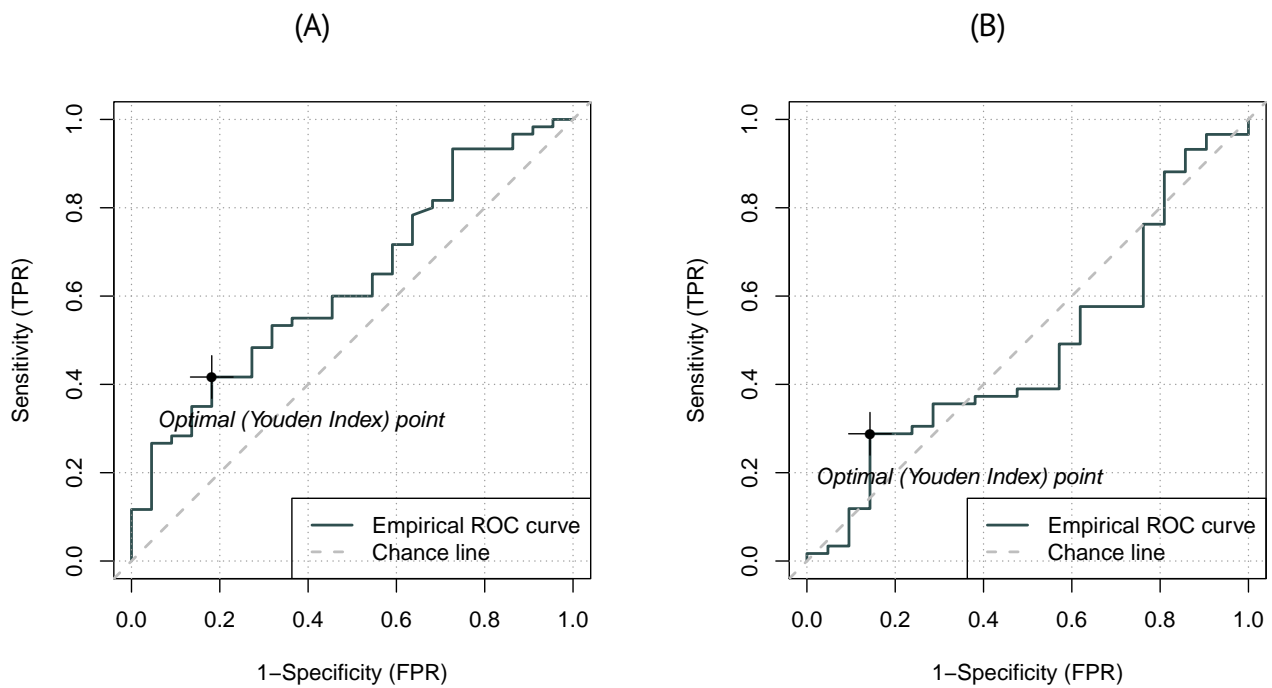

**Figure S56.** Receiver operating characteristics analysis with optimal point for the dissimilarity in diagnosing congenital heart disease, comparing single- (A) and multi-slice (B) diffusion weighted imaging.

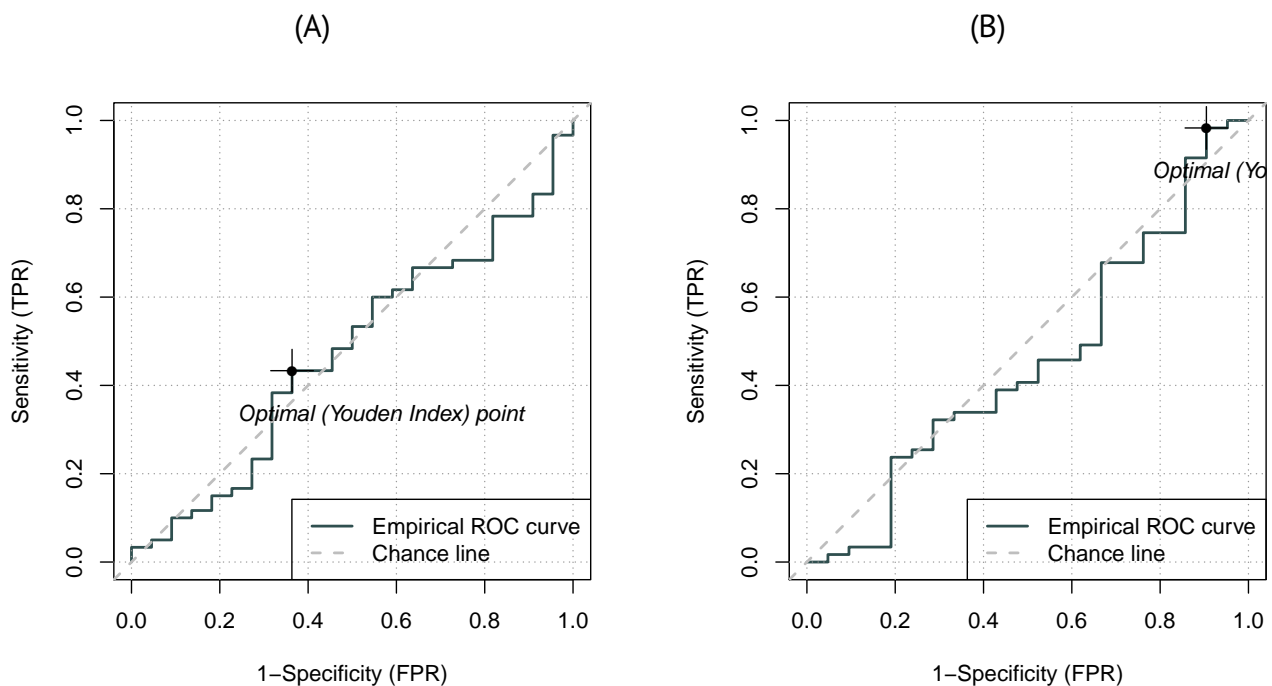

**Figure S57.** Receiver operating characteristics analysis with optimal point for the energy in diagnosing congenital heart disease, comparing single- (A) and multi-slice (B) diffusion weighted imaging.

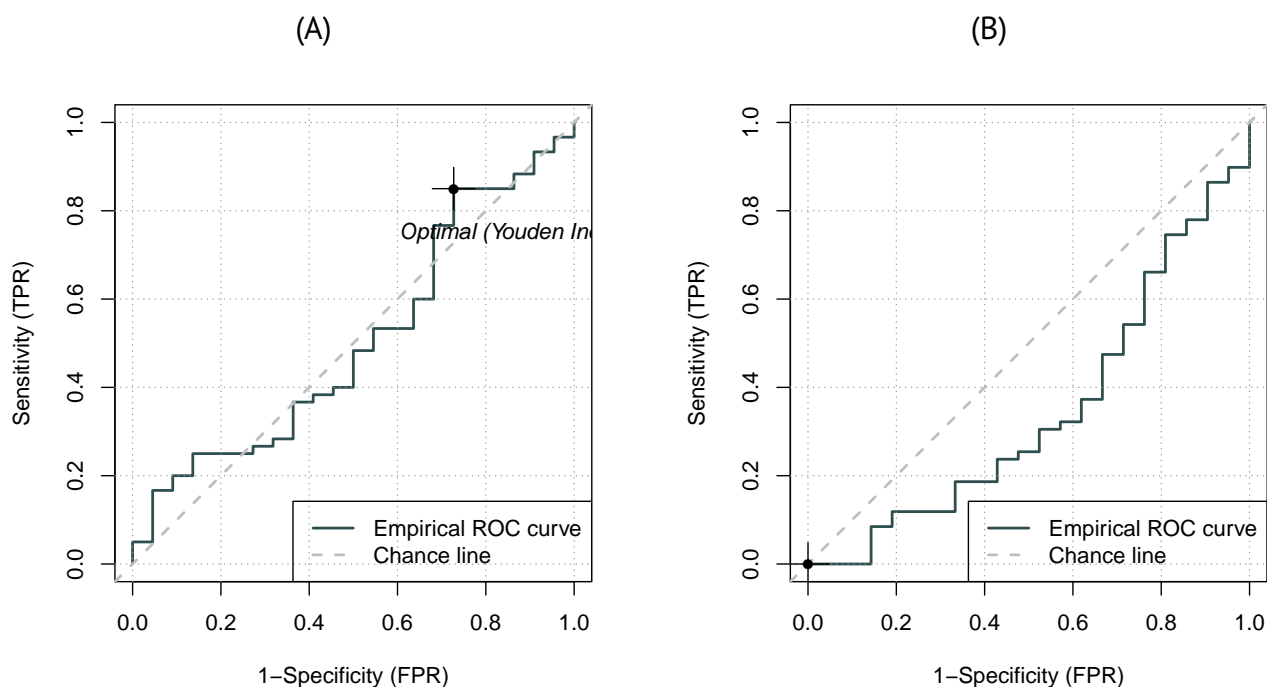

**Figure S58.** Receiver operating characteristics analysis with optimal point for the entropy in diagnosing congenital heart disease, comparing single- (A) and multi-slice (B) diffusion weighted imaging.

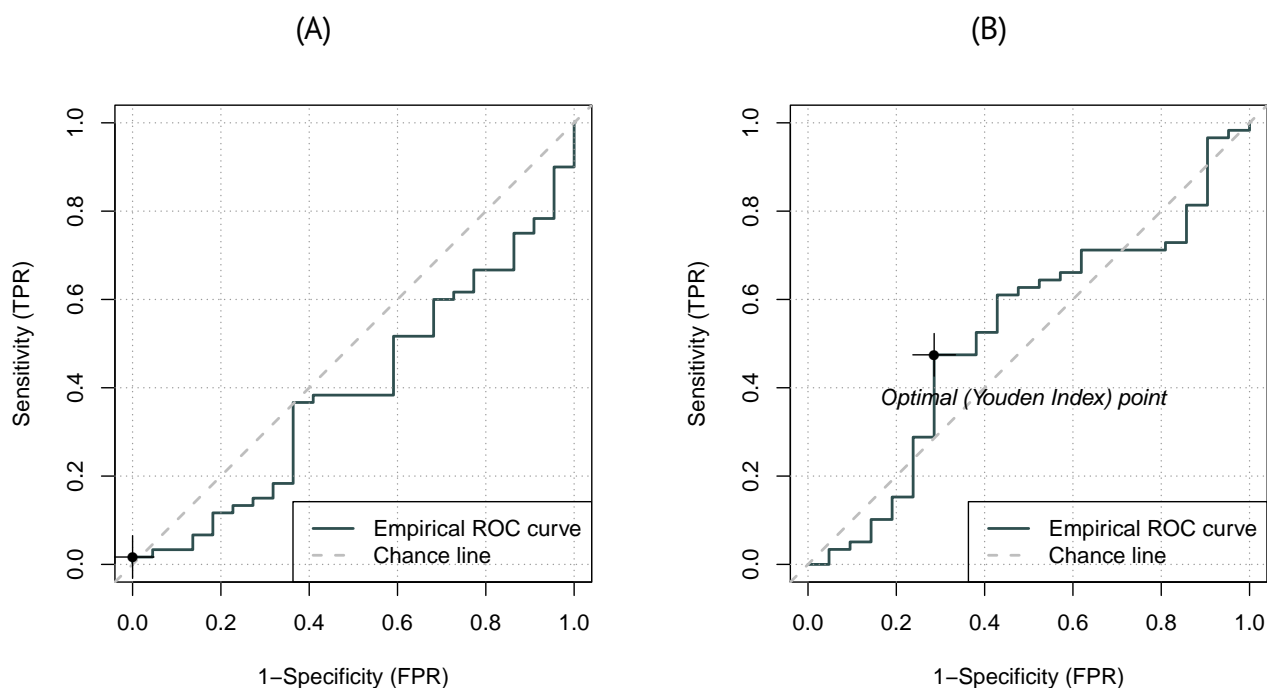

**Figure S59.** Receiver operating characteristics analysis with optimal point for the homogeneity in diagnosing congenital heart disease, comparing single- (A) and multi-slice (B) diffusion weighted imaging.



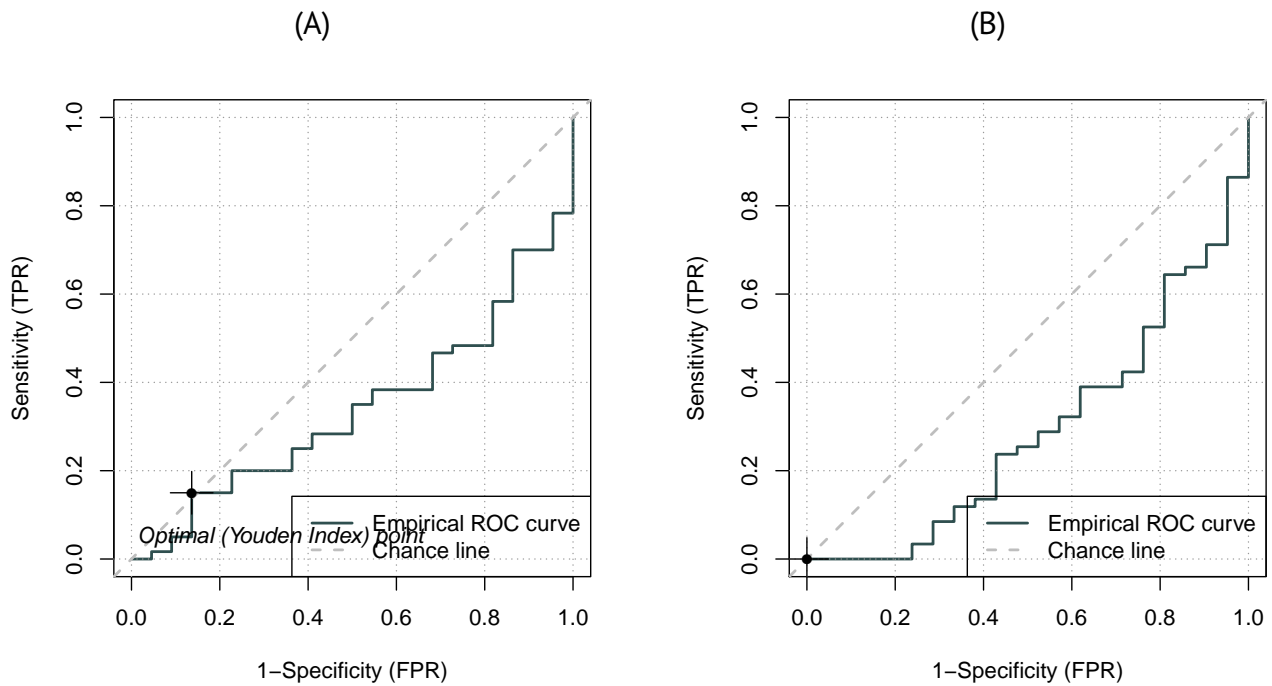

**Figure S60.** Receiver operating characteristics analysis with optimal point for the kurtosis in diagnosing congenital heart disease, comparing single- (A) and multi-slice (B) diffusion weighted imaging.

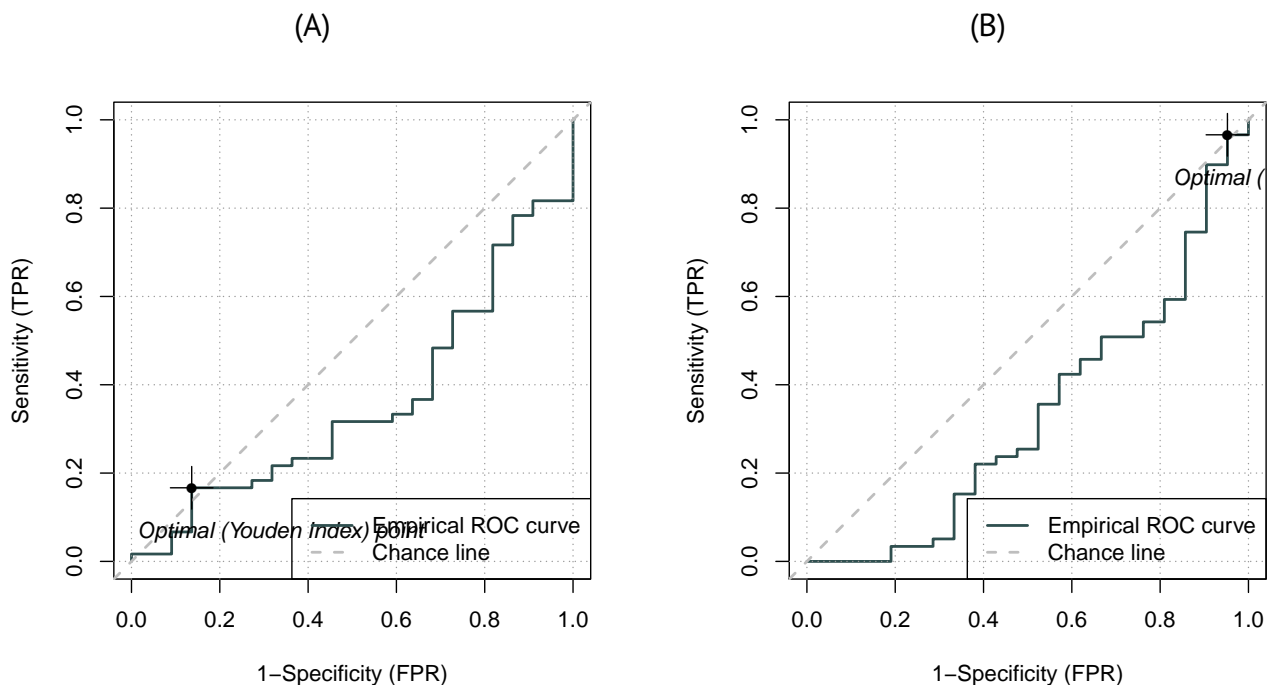

**Figure S61.** Receiver operating characteristics analysis with optimal point for the skewness in diagnosing congenital heart disease, comparing single- (A) and multi-slice (B) diffusion weighted imaging.

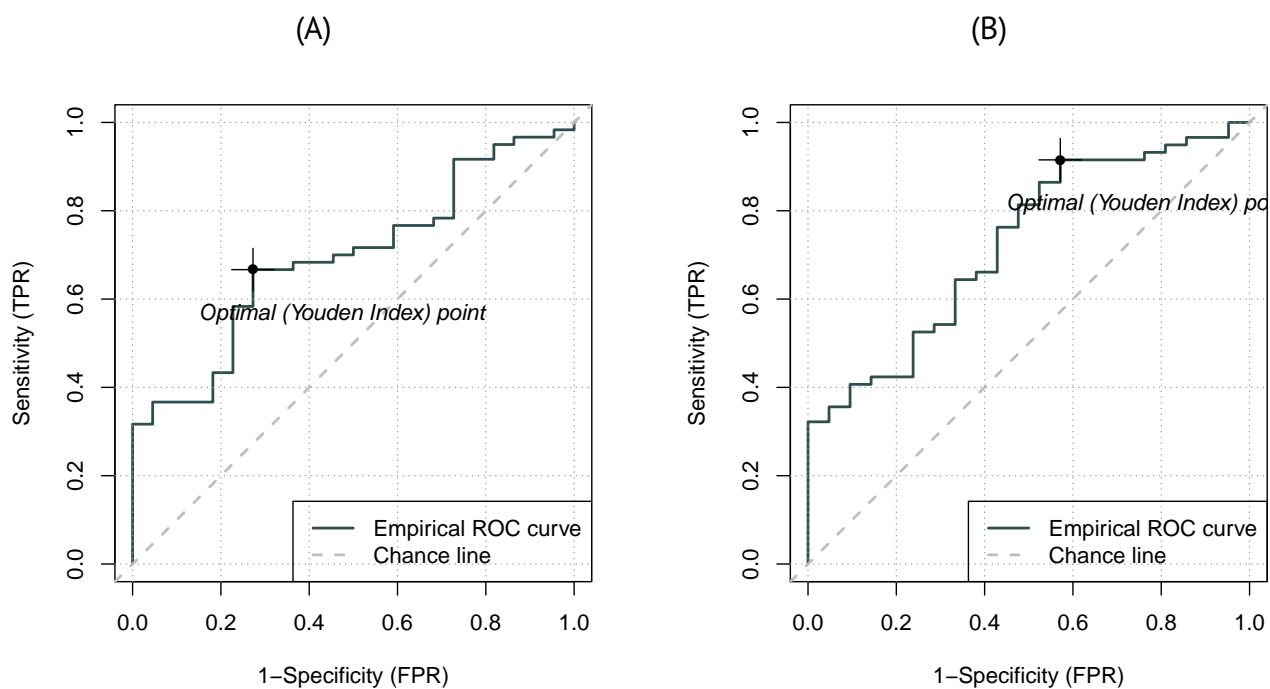

**Figure S62.** Receiver operating characteristics analysis with optimal point for the variance in diagnosing congenital heart disease, comparing single- (A) and multi-slice (B) diffusion weighted imaging.
